# Supplementary material for: Global emissions of fluorinated greenhouse gases 2005–2050 with abatement potentials and costs
Source: Copernicus journal article supplement (doi:10.5194/acp-2016-727), 2016-08-16
Supplement: Supplementary file 1 [file acp-2016-727-supplement.pdf]

Supplementary material to:

## Global emissions of fluorinated greenhouse gases 2005-2050 with abatement potentials and costs

---

Pallav Purohit<sup>1</sup> and Lena Höglund-Isaksson<sup>1</sup>

<sup>1</sup>Air Quality and Greenhouse Gases (AIR) Program, International Institute for Applied Systems Analysis (IIASA),  
Schlossplatz 1 - A-2361 Laxenburg, Austria.

*Correspondence to:* Pallav Purohit (purohit@iiasa.ac.at)

## Contents

|                                                                |    |
|----------------------------------------------------------------|----|
| S1. Introduction .....                                         | 3  |
| S2. F-gas emission estimations by sector .....                 | 3  |
| S2.1 Hydrofluorocarbon (HFC) emissions .....                   | 3  |
| S2.1.1 Stationary air-conditioning (residential sector).....   | 5  |
| S2.1.2 Stationary air-conditioning (commercial sector) .....   | 7  |
| S2.1.3 Domestic refrigeration .....                            | 8  |
| S2.1.4 Commercial refrigeration.....                           | 8  |
| S2.1.5 Industrial refrigeration .....                          | 10 |
| S2.1.6 Refrigerated transport .....                            | 11 |
| S2.1.7 Mobile air-conditioning .....                           | 13 |
| S2.1.8 Foams .....                                             | 13 |
| Polyurethane one component foam (OC).....                      | 13 |
| Other foams (OF).....                                          | 15 |
| S2.1.9 Aerosols.....                                           | 15 |
| S2.1.10 HCFC-22 production .....                               | 16 |
| S2.1.11 Ground source heat pumps .....                         | 17 |
| S2.1.12 Fire extinguishers.....                                | 19 |
| S2.1.13 Solvents .....                                         | 21 |
| S2.2 Perfluorocarbon compounds (PFC) emissions .....           | 22 |
| S2.2.1 Aluminium Industry.....                                 | 22 |
| S2.2.2 Semiconductor industry, PFC use in CVD and etching..... | 23 |
| S2.3 Sulphur hexafluoride (SF <sub>6</sub> ) emissions .....   | 24 |
| S2.3.1 High and mid voltage switches.....                      | 24 |
| S2.3.2 Magnesium production and magnesium casting.....         | 24 |
| S2.3.3 Soundproof windows .....                                | 24 |
| S2.3.4 Other applications.....                                 | 25 |
| References .....                                               | 36 |

## S1. Introduction

This is a description by sector of the estimations of global anthropogenic emissions of F-gases (HFC, PFC and SF<sub>6</sub>) presented in the paper “Global emissions of fluorinated greenhouse gases 2005-2050 with abatement potentials and costs.” It provides further insights into the details of the activity data, estimations of emissions, mitigation potentials and associated costs as well as a discussion of the most important sources for uncertainty in the sector estimates.

## S2. F-gas emission estimations by sector

### S2.1 Hydrofluorocarbon (HFC) emissions

In compliance with the Montreal protocol (MP), many sectors that formerly used the highly ozone-depleting substances (ODS) chlorofluorocarbons (CFCs) refrigerants changed rapidly to applications employing hydrochlorofluorocarbons (HCFCs) with lower ozone-depleting effects or hydrofluorocarbons (HFCs) with no ozone-depleting effects (IPCC/TEAP, 2005). Later, amendments to the MP require a complete phase-out of all ODS including HCFCs (UNEP, 2007). In the GAINS model, 14 different sources of HFC or HCFC emissions have been identified, whereof 8 are related to refrigeration and air conditioning. Table S1 presents sub-sectors distinguished in GAINS for HFC or HCFC emissions. Emissions from refrigeration and air conditioning sources are split by emissions from leakage from equipment in use and emissions from scrapping of the equipment at the end-of-life. In addition, for each emission source the fraction of HCFC to HFC in use is identified and modeled following the phase-out schedule of HCFCs in the latest revision of the MP.

**Table S1. Sub-sectors distinguished in GAINS for HFC emissions**

| <b>GAINS sectors</b> | <b>Description</b>                                                                                      |
|----------------------|---------------------------------------------------------------------------------------------------------|
| AERO                 | Aerosols                                                                                                |
| CAC_B                | Stationary air conditioning (commercial sector) using water chilling, emissions banked in equipment     |
| CAC_S                | Stationary air conditioning (commercial sector) using water chilling, emissions from scrapped equipment |
| COMM_B               | Commercial refrigeration, emissions banked in equipment                                                 |
| COMM_S               | Commercial refrigeration, emissions from scrapped equipment                                             |
| DOM_S                | Domestic small hermetic refrigerators, emissions from scrapped equipment                                |
| FEXT_B               | Fire extinguishers, emissions banked in equipment                                                       |
| FEXT_S               | Fire extinguishers, emissions from scrapped equipment                                                   |
| GSHP_B               | Ground source heat pumps, emissions banked in equipment                                                 |
| GSHP_S               | Ground source heat pumps, emissions from scrapped equipment                                             |
| HCFC22_E             | HCFC-22 production for emissive use                                                                     |
| HCFC22_F             | HCFC-22 production for feedstock use                                                                    |
| HFC_OTH              | Other (e.g. cleansing, micro etching, semiconductor industry, etc.)                                     |
| IND_B                | Industrial refrigeration (including food and agricultural), emissions banked in equipment               |
| IND_S                | Industrial refrigeration (including food and agricultural), emissions from scrapped equipment           |

|               |                                                                                                          |
|---------------|----------------------------------------------------------------------------------------------------------|
| TRA_RD_HDB_B  | Mobile air conditioning in buses, emissions banked in equipment                                          |
| TRA_RD_HDB_S  | Mobile air conditioning in buses, emissions from scrapped equipment                                      |
| TRA_RD_LD4C_B | Mobile air conditioning in cars, emissions banked in equipment                                           |
| TRA_RD_LD4C_S | Mobile air conditioning in cars, emissions from scrapped equipment                                       |
| TRA_RD_LD4T_B | Mobile air conditioning in light duty trucks, emissions banked in equipment                              |
| TRA_RD_LD4T_S | Mobile air conditioning in light duty trucks, emissions from scrapped equipment                          |
| TRA_RD_HDT_B  | Mobile air conditioning in heavy duty trucks, emissions banked in equipment                              |
| TRA_RD_HDT_S  | Mobile air conditioning in heavy duty trucks, emissions from scrapped equipment                          |
| OC            | Polyurethane one component foam                                                                          |
| OF            | Other foam                                                                                               |
| RAC_B         | Stationary air conditioning (residential sector) using water chilling, emissions banked in equipment     |
| RAC_S         | Stationary air conditioning (residential sector) using water chilling, emissions from scrapped equipment |
| SOLV_PEM      | Solvents                                                                                                 |
| TRA_REFB      | Refrigerated transport, emissions banked in equipment                                                    |
| TRA_REFS      | Refrigerated transport, emissions from scrapped equipment                                                |

HFC emissions from different sectors are calculated using an emission factors approach where general assumptions are used for leakage rates at different stages of HFC use and at disposal at the end of life of appliance and equipment. To the extent available, source-specific leakage rates are taken from published literature (IPCC/TEAP, 2005; IPCC, 2007a; Gschrey et al., 2011; Schwarz et al., 2011; Chaturvedi et al., 2015). Emission factors are sector specific with GWPs determined on the basis of the sector-specific shares of different types of HFCs commonly used and their respective GWPs. Table S2 presents GWPs used in GAINS, expressed in CO<sub>2</sub> equivalents over 100 years, as presented in the IPCC Fourth Assessment Report (AR4) (IPCC, 2007b) and now adopted for policy purposes in the Kyoto protocol. GWP's associated with perfluorocarbons (PFCs) and sulfur hexafluoride (SF<sub>6</sub>) are also presented in Table S2.

**Table S2. Sector specific global warming potentials (GWPs) used in GAINS**

| Sector                       | Type and share of different types of refrigerants | Global warming potential |            |            |
|------------------------------|---------------------------------------------------|--------------------------|------------|------------|
|                              |                                                   | IPCC (AR2)               | IPCC (AR4) | IPCC (AR5) |
| Aerosol                      | HCFC-141b                                         | 713                      | 725        | 782        |
|                              | HFC-134a                                          | 1300                     | 1430       | 1550       |
| Stationary air-conditioning* | HCFC-22                                           | 1780                     | 1810       | 1760       |
|                              | 87% HFC-410A and 13% HFC-134a                     | 1670                     | 2002       | 2018       |
| Commercial refrigeration     | HCFC-22                                           | 1780                     | 1810       | 1760       |
|                              | HFC-134a (25%)/ HFC-404A (70%)/ HFC-410A (5%)     | 2693                     | 3207       | 3237       |
| Domestic refrigeration       | HFC-134a                                          | 1300                     | 1430       | 1550       |
| Fire extinguishers           | Halon-1211/Halon-1301                             | 4445                     | 4515       | 4020       |
|                              | HFC-236fa (50%)/HFC-227ea (47.5%)/HFC-23 (2.5%)   | 4820                     | 6805       | 6805       |
| Ground source heat pumps     | HCFC-22                                           | 1780                     | 1810       | 1760       |
|                              | HFC-410A                                          | 1725                     | 2088       | 1924       |
| Industrial refrigeration     | HCFC-22                                           | 1780                     | 1810       | 1760       |

|                                  |                                                                 |       |        |       |
|----------------------------------|-----------------------------------------------------------------|-------|--------|-------|
|                                  | HFC-134a (62%)/ HFC-404A (37%)/ HFC-23 (1%)                     | 2129  | 2486   | 2560  |
| Mobile air conditioning**        | HFC-134a                                                        | 1300  | 1430   | 1550  |
| Refrigerated transport           | HCFC-22                                                         | 1780  | 1810   | 1760  |
|                                  | HFC-134a (80%)/ HFC-404A/ HFC-507 (18%)/ HFC-410A (2%)          | 1661  | 1892   | 2363  |
| Foam <sup>+</sup>                | HCFC-141b                                                       | 713   | 725    | 782   |
|                                  | HFC-134a (33%)/ HFC-245fa (61%)/ HFC-365mfc (5%)/ HFC-152a (1%) | 1098  | 1141   | 1181  |
| Other HFC                        | HCFC-22                                                         | 1780  | 1810   | 1760  |
|                                  | HFC-134a                                                        | 1300  | 1430   | 1550  |
| HCFC-22 production <sup>++</sup> | HFC-23                                                          | 11700 | 14,800 | 12400 |
| Primary Al production            | CF <sub>4</sub>                                                 | 6500  | 7390   | 6630  |
| Semiconductor industry           |                                                                 |       |        |       |
| High and mid voltage switches    | SF <sub>6</sub>                                                 | 23900 | 22800  | 23500 |
| Magnesium production and casting |                                                                 |       |        |       |
| Soundproof windows               |                                                                 |       |        |       |
| Other SF <sub>6</sub>            |                                                                 |       |        |       |

\*Stationary air-conditioning includes both commercial and residential air-conditioning

\*\*Mobile air-conditioning includes buses, cars, light and heavy duty trucks

<sup>+</sup>Foam includes both one component and other foams

<sup>++</sup>HCFC-22 production for both emissive and feedstock use

Source: (IPCC, 1996; IPCC, 1997; IPCC, 2007b; Gschrey et al., 2011; UNFCCC, 2012; IPCC, 2014)

### ***S2.1.1 Stationary air-conditioning (residential sector)***

To estimate emissions from stationary air conditioners (AC's) in the residential sector, we apply a method similar to what has been used in a model described by (McNeil and Letschert, 2007). HFC use for air conditioning depends both on the average HFC consumption per household using air conditioning (kg HFC/unit) and on the fraction of households who own air conditioners (penetration).

$$HFC\ consumption = Households \times Penetration \times Average\ charge\ size \quad (1)$$

The number of households was calculated by dividing total population by average household size. Data and scenario values for average household sizes are taken from the UN Global Report on Human Settlements 2005 (UN-Habitat, 2005).

We assume that both energy consumption per appliance and the proportion of households owning air conditioners (penetration) depend on climate and income, being higher in warmer and richer places. Penetration in a certain region is formulated as a function of the climate maximum saturation for that region and of the percentage of the climate maximum saturation achieved at that time in the region (availability).

$$Penetration = Availability \times Climate\ Maximum\ Saturation \quad (2)$$

The climate maximum saturation is derived from the assumption that current penetration rates in the USA are the maximum for a climate with a given amount of cooling degree days (CDD's). The relationship between maximum saturation and CDD is exponential, as developed by (Sailor and Pavlova, 2003) and corrected to give a maximum of 100 percent by (McNeil and Letschert, 2007) whose equation we have used here. Availability of air conditioners as a function of income is assumed to develop along a logistic function, with a threshold point beyond

which ownership increases rapidly. Using data on present day air conditioner penetration in various countries from McNeil and Letschert (2007) we find availability as a function of income

$$Availability = \frac{1}{1 + e^{4.152 \times e^{-0.237 \times Income/1000}}} \quad (3)$$

where income is defined as GDP per capita in purchasing power parity (PPP) and converted to constant Euro 2010.

GDP and population data is taken from the GAINS model in consistency with relevant external scenarios, i.e. the PRIMES model for EU-28 countries Capros et al. (2012) and the IEA's Energy Technology Perspective (ETP) for non-EU countries (IEA/OECD, 2012). Data on cooling degree days and household size is taken from (Baumert and Selman, 2003) and (UN-Habitat, 2005), respectively. Once the number of stationary air conditioners is estimated, the HFC consumption is estimated assuming the average size of each appliance is 2.62 kW (Adnot et al., 2003) (Sailor and Pavlova, 2003) and the average refrigerant charge is 0.25 kg per kW (UNEP, 2011). An annual leakage rate of 11 percent and 13 percent is assumed for unitary air-conditioning systems in developed and developing countries respectively (Gschrey et al., 2011). At the end-of-life the scrapped equipment is assumed to be fully loaded with refrigerant which needs recovery with recycling or destruction. Servicing emissions are especially high for the informal servicing sector which constitutes a large part of servicing market in developing countries. For India, due to inadvertent releases during servicing of the air-conditioning equipment a higher annual leakage rate of 25 percent is used in this study (Chaturvedi et al., 2015).

The control options available for this source are different good practice options including leakage control, improved components and end-of-life recollection. These options are assumed to remove 30 percent of emissions banked in equipment in use and almost 88 percent of scrapping emissions (Tohka, 2005). Good practice options are being implemented in the EU as part of the different regulations controlling F-gases (Höglund-Isaksson et al., 2013). In countries with no prior national F-gas regulation in EU, full adoption of good practice options is assumed from 2015 onwards. For substantial further emission reductions, the use of HFC-410A (GWP<sub>100</sub>=2002) and other high GWP blends need to be replaced by an alternative low GWP refrigerant such as HFC-32 (GWP<sub>100</sub>=675) or HC-290 (GWP<sub>100</sub> = 3) pressurized CO<sub>2</sub> (GWP<sub>100</sub>=1).

One of the important features of low-GWP HFC alternatives refrigerants (i. e. HFC-32) is their heat transfer capacity. HFC-32 possesses about 1.5 times higher heat transfer capacity than HFC-410A, which means that its charge volume can be up to 30 percent smaller than existing refrigerants, depending on the model design. According to Daikin Europe N.V. (manufacturer of HFC-32 based AC's), HFC-32 is currently being used in more than 6 million air-conditioning units in more than 40 countries worldwide, including Japan, India, Australia, Thailand and several other Asian, Middle East and European countries (Daikin, 2016). In 2012, Godrej & Boyce Mfg. Co. Ltd. launched their first HC-290 split AC's, which was the first in India. Since then, more than 100,000 AC's have been placed on the market (Rajadhyaksha et al., 2015).

In recent years, companies like Honeywell and Dupont have developed and marketed alternative substances with better performances and very short lifetimes of less than a few months. These are known as HFOs (or unsaturated HFCs). E.g. HFO-1234ze with a GWP<sub>100</sub> of 6 can be used in foam products and HFO-1234yf with a GWP<sub>100</sub> of 4 can be used in mobile air-conditioners. The suitability of these substances for stationary air conditioners has not yet been confirmed and they are therefore currently not applied in GAINS for this source. Another option would

be to use other non-HFC substances with low or zero GWP like hydrocarbons, CO<sub>2</sub>, dimethyl ether and other diverse substances used in various types of foam products, refrigeration, air-conditioning and fire protection systems. Switching to these alternatives is typically costly because it involves process modifications (Halkos, 2010), e.g., changing the process type from ordinary to secondary loop systems.

### S2.1.2 Stationary air-conditioning (commercial sector)

The GAINS model store data on commercial floor space area for Annex-1 countries (Cofala et al., 2009). The primary data source for this data is the PRIMES model (Capros et al., 2012). For year 2005, the data on commercial floor space area was correlated with GDP/capita as illustrated in Figure S1. Fitting a linear trend line, the following relationship was retrieved:

$$\left[ \left( \frac{\text{Commercial floor space}}{\text{Capita}} \right) = 0.0003 \left( \frac{\text{GDP}}{\text{Capita}} \right) + 7.1984 \right] \quad (R^2 = 0.6737) \quad (4)$$

Using GDP per capita as driver, projections for future growth in commercial floor space area were obtained for each country. To estimate the HFC consumption in commercial air conditioning, a sector specific HFC consumption value of 0.02 kg/m<sup>2</sup> was applied (Höglund-Isaksson et al., 2013).

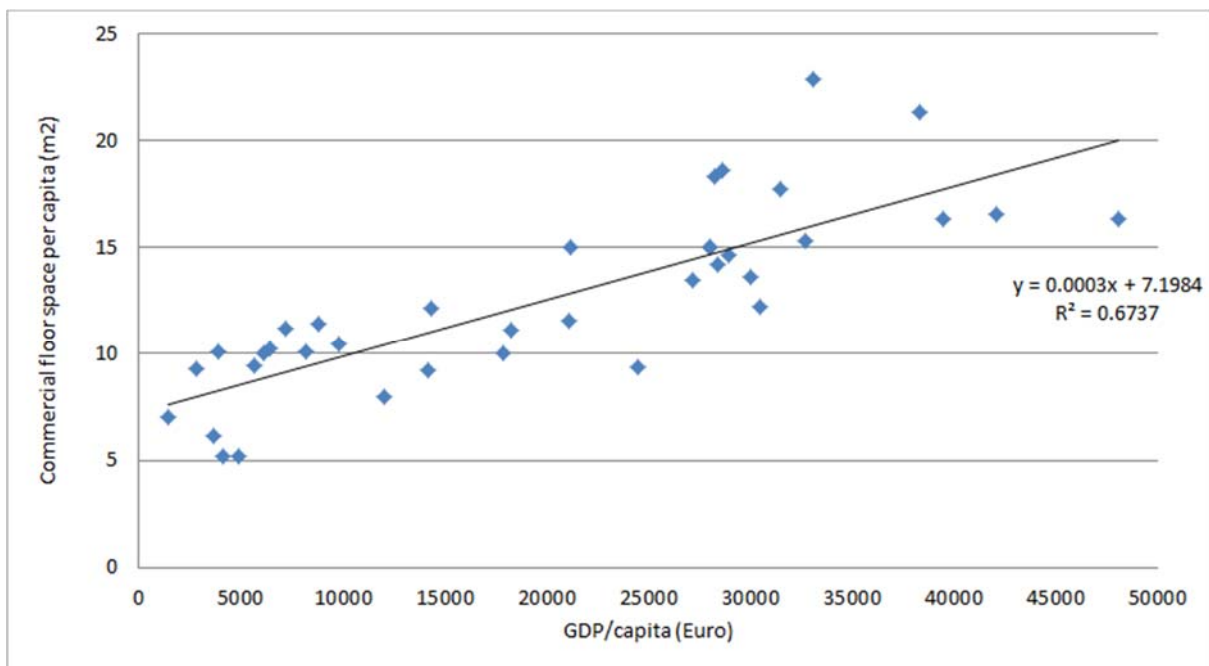

**Figure S1. Variation of commercial floor space per capita w.r.t. GDP per capita in year 2005.**

Source: PRIMES model.

An annual leakage rate of 11 percent and 13 percent is assumed for unitary air-conditioning systems in developed and developing countries respectively (Gschrey et al., 2013). At the end-of-life the scrapped equipment is assumed to be fully loaded with refrigerant which needs recovery, recycling or destruction. Control options available for this source are similar to the options discussed for residential air conditioning (Section 2.1.1).

### **S2.1.3 Domestic refrigeration**

For refrigeration in the domestic sector, growth in activity levels follows growth in number of households. Stock of refrigerators and national end use consumption are driven by population growth and trends in appliance ownership rates. In developed countries the market for refrigerators is saturated, i.e., nearly every household owns a refrigerator. Ownership rates are further increased only by ownership of multiple units of each appliance. In developing countries, however, ownership rates of even basic appliances are dynamic, and depend critically on household income level, degree of urbanization and electrification. In countries experiencing rapid growth in those parameters (e.g. China, India, Brazil etc.), appliance ownership growth is dramatic.

The GAINS model utilizes population forecasts in combination with an income model and econometric parameterization to arrive at the national ownership rate for each year in the forecast. The rate of ownership of refrigerator(s) per household is derived using a function estimated by the PAMS<sup>1</sup> model (2012). The general form of the function for the rate of refrigerator ownership per household is given by:

$$Sat_{DOM} = (K \times I_t)^{\lambda_a} \times \left[ 1 - e^{-(bE_t^{\lambda_b} + cU_t^{\lambda_c})} \right]^a \quad (5)$$

where  $Sat_{DOM}$  represents the saturation (rate) of domestic refrigerator ownership,  $I$  is the monthly household income given by GDP per household in the country,  $U$  is the national urbanization rate,  $E$  is the national electrification rate, and  $t$  is the year of the projected saturation.

The econometric parameter estimates from the PAMS model were applied to derive the rate of refrigerator ownership per household in GAINS. The number of refrigerators in a country was calculated by multiplying the ownership rate by the number of households in a country (UN-Habitat, 2005). Growth in number of refrigerators is driven by population growth and trends in appliance ownership as estimated above. Once the number of refrigerators is estimated, an average refrigerant charge of 0.1 kg HFC per unit (USEPA, 2010a) is used to estimate the HFC consumption in domestic refrigerators.

As domestic refrigerators are hermetic there is no risk of leakage during use, but there is a risk of emission release during the scrapping phase. At the end-of-life the scrapped equipment is assumed to be fully loaded with refrigerant which needs recovery with recycling or destruction. The control option available for this source is good practice during end-of-life scrapping, which is assumed to remove 80 percent of emissions (Tohka, 2005). The option is already in place in the EU through the F-gas Regulation 2006 (Schwarz et al., 2011). HC-600a (GWP<sub>100</sub>=3) is widely available for domestic refrigeration applications and suitable components (such as compressors) are widely available (UNEP, 2015a). HFOs are not yet used for this application. Compressors optimized for HFO-1234yf or HFO-1234ze in domestic refrigeration appliances are not yet widely available.

### **S2.1.4 Commercial refrigeration**

Commercial refrigeration includes refrigerated equipment found in supermarkets, convenience stores, restaurants, and other food service establishments (Giroto et al. 2004). Equipment in this end-use typically lasts

---

<sup>1</sup> The methodology of the PAMS (Policy Analysis Modeling System) model developed by CLASP (Collaborative Labeling and Appliance Standards Program) is used to estimate the number of domestic refrigerators (see: [www.clasponline.org](http://www.clasponline.org)) in this study.



approximately 15–20 years. At present, the commercial refrigeration sector accounts for approximately 32 percent of global HFC consumption or 40 percent of HFC consumption in the refrigeration/AC sector (USEPA 2010b).

Starting point for the estimation of emissions from commercial refrigeration in Annex-I countries in GAINS is the HFC consumption reported by member countries to the United Nations Framework Convention on Climate Change (UNFCCC) for this sector for the years 2005 and 2010. Figure S2 presents the HFC consumption in commercial refrigeration per unit value added for commercial sector in 2005 as reported by Annex-I countries to UNFCCC. As shown, reported rates vary greatly across countries. As we are not able to fully explain the variations in the reported consumption, e.g., by having access to information on consumption patterns for refrigerated goods, we adopt HFC consumption as reported. Projections for future HFC consumption are driven by growth in service sector value added.

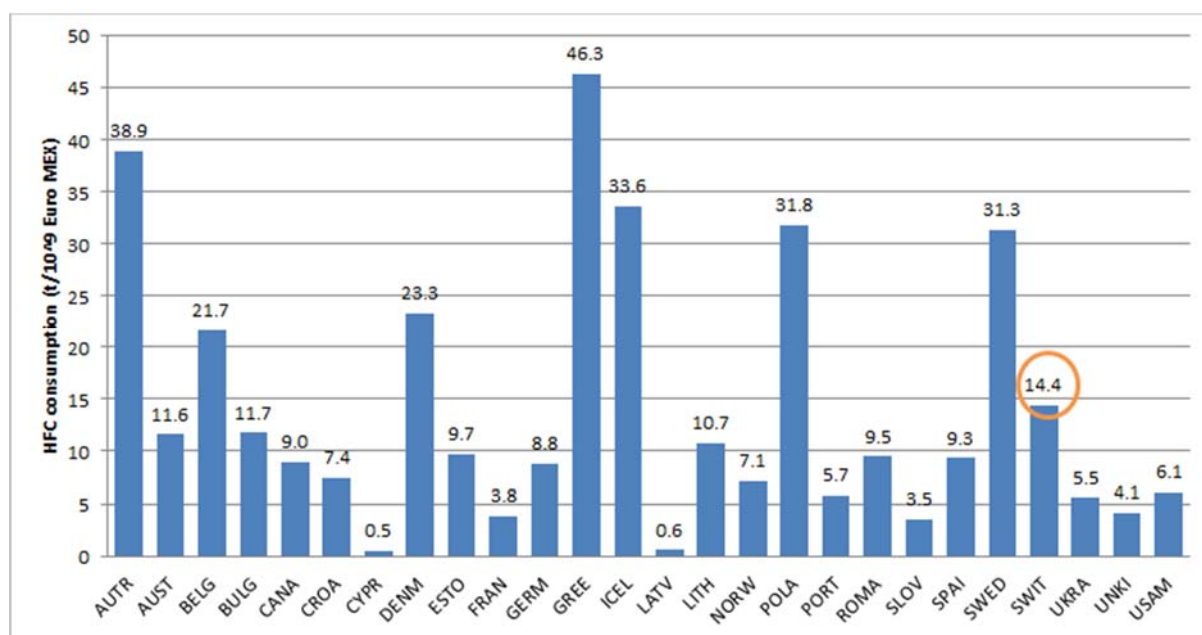

**Figure S2. HFC consumption in commercial refrigeration per unit value added for commercial sector in 2005 for Annex-I countries**

Source: UNFCCC (2012)

For countries not reporting HFC consumption in this sector, the Swiss consumption rate of 14.4 tonne HFC per billion Euro value added in 2005 has been adopted as default. For 2009-10, HCFC consumption in the commercial refrigeration sector of China was 19.8 tonne HCFC per billion Euro value added (UNEP, 2011) whereas HCFC consumption in the commercial refrigeration sector of India was 1100 tonne in 2005 (MoEF, 2009) or 3.8 tonne HCFC per billion Euro value added. Due to the unavailability of HCFC consumption data for other developing countries, we adopt the Chinese and Indian value as default for HCFC consumption in the commercial refrigeration sector of developing countries in general. Projections for service sector value added are adopted from the macroeconomic scenario by PRIMES baseline scenario (Capros et al., 2013) for EU-28 and IEA/OECD (2012) for non-EU-28 countries. An annual leakage rate of 18 percent for industrialized and 22 percent for developing countries (Gschrey et al., 2011) from equipment in use is applied consistently across all GAINS regions. This leakage mainly reflects losses during refill. At the end-of-life the scrapped equipment is assumed to be fully loaded with refrigerant which needs recovery, recycling or destruction.

The control options available for this source are different good practice options including leakage control, improved components and end-of-life recollection. These options are assumed to remove 33 percent of emissions banked in equipment in use and almost 80 percent of scrapping emissions. For substantial further emission reductions, the use of HFC-134a (GWP<sub>100</sub>=1430), HFC-404A (GWP<sub>100</sub>=3922), HFC-410A (GWP<sub>100</sub>=2088) and other high GWP blends need to be replaced by alternative low GWP refrigerants such as HFC-152a (GWP<sub>100</sub>=124), hydrocarbons and natural refrigerants (i.e. pressurized CO<sub>2</sub>, ammonia etc.). For stand-alone systems, HFO-1234yf and HFO-1234ze are possible alternatives when HCs are restricted by regional safety codes, as they have lower flammability. For condensing units, CO<sub>2</sub> is an option, although getting high efficiency and low capital cost is proving a challenge for condensing units. For new centralized systems, CO<sub>2</sub> is now in widespread use, especially in Europe (UNEP, 2015b).

### ***S2.1.5 Industrial refrigeration***

Food processing and cold storage is an important application of industrial refrigeration used for preservation and distribution of food while keeping nutrients intact. On a global scale this application is very significant in size and economic importance (Mohanraj et al. 2009). The application includes cold storage (at temperatures from -1°C to 10°C), freezing (-30°C to -35°C) and the long-term storage of frozen products (-20°C to -30°C). The preferred HFCs used are HFC-134a and HFC blends with a small temperature glide such as HFC-404A, HFC-507A and HFC-410A. Ammonia/CO<sub>2</sub> cascade systems are also being used, as are hydrocarbons as primary refrigerants in indirect systems (IPCC/TEAP 2005).

Starting point for the estimation of emissions from industrial refrigeration in Annex-I countries in GAINS is the HFC consumption reported for this source by member states to the UNFCCC for the years 2005 and 2010. Figure S3 presents the HFC consumption in industrial refrigeration per unit value added for industrial sector in 2005 as reported by Annex-I countries to UNFCCC. As shown, reported rates vary greatly across countries. As we are not able to explain the variations in the reported consumption, we adopt it as activity data as reported. Projections for future HFC consumption are driven by growth in value added for manufacturing industry. For countries not reporting HFC consumption in this sector, the German consumption per value added has been adopted as default. For 2009-10, HCFC consumption in the industrial refrigeration sector of China was 19.8 tonne HCFC per billion Euro value added (UNEP, 2011) whereas HCFC consumption in the industrial refrigeration sector of India in 2005 was 5.9 tonne HCFC per billion Euro value added (MoEF, 2009). Due to the unavailability of HCFC consumption data for other developing countries, we adopt the Chinese and Indian value as default for HCFC consumption in the industrial refrigeration sector of developing countries in general. Projections for manufacturing industry value added are adopted from the macroeconomic scenario by PRIMES baseline scenario (Capros et al., 2013) for EU-28 and IEA/OECD (2012) for non-EU-28 countries.

An annual leakage rate of 11 percent for industrialized and 13.7 percent for developing countries (Gschrey et al., 2011) from industrial refrigeration equipment in use is applied consistently across all GAINS regions. At the end-of-life the scrapped equipment is assumed to be fully loaded with refrigerant which needs recovery with recycling or destruction.

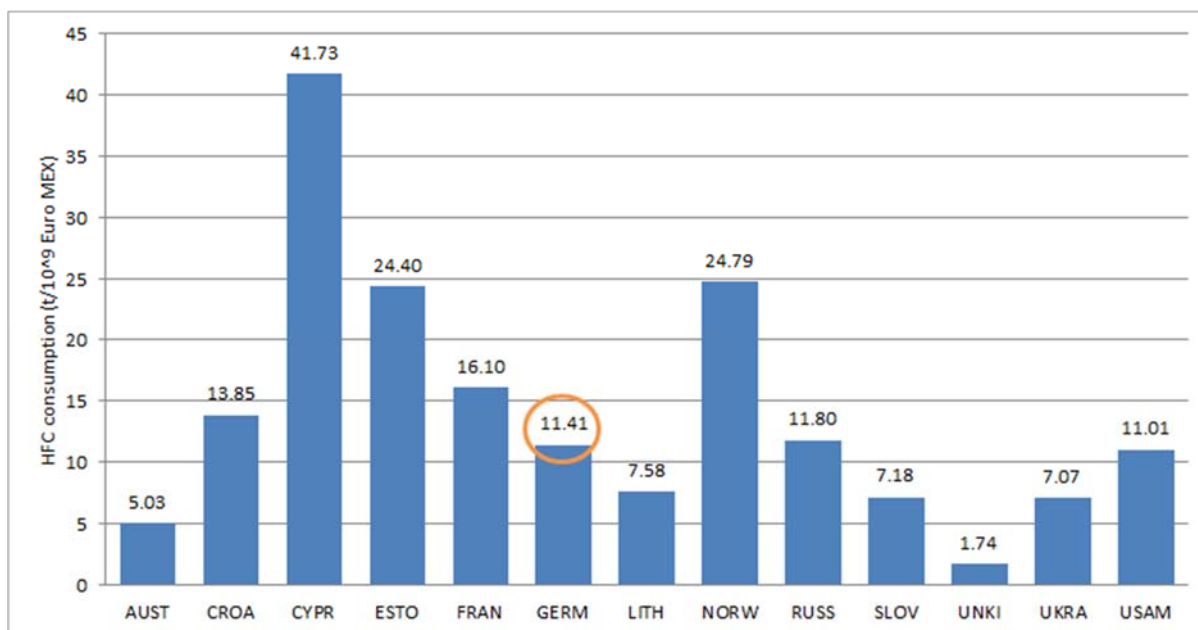

**Figure S3. HFC consumption in industrial refrigeration per unit value added for industrial sector in 2005 for Annex-I countries**

Source: UNFCCC (2012)

The control options available for this source are different good practice options including leakage control, improved components and end-of-life recollection. These options are assumed to remove 42 percent of emissions banked in equipment in use and almost 90 percent of scrapping emissions (Tohka, 2005). Good practice options are already implemented in the EU and other annex-I countries as part of the different regulations controlling F-gases. For substantial further emission reductions, the use of HFC-134a (GWP<sub>100</sub>=1430), HFC-404A (GWP<sub>100</sub>=2088) and other high GWP blends need to be replaced by alternative low GWP refrigerants such as ammonia (NH<sub>3</sub>) or pressurized CO<sub>2</sub> (Pearson, 2008; Messineo, 2012).

### ***S2.1.6 Refrigerated transport***

Refrigerated road transport includes transportation of food products (fresh, frozen or chilled), pharmaceutical products, and plants/flowers. The type of vehicles used for such transportations are trailers, heavy and small trucks, and vans. Refrigerated road transport vehicles have different capacities; vans are typically below 3.5 tonnes, small trucks and trailers vary between 3.5 to 7.5 tonnes, and heavy trucks have a capacity of more than 7.5 tonnes.

In 2010, there were around 4 million refrigerated vehicles in service worldwide (UNEP, 2010), including vans (40%), trucks (30%), semi-trailers or trailers (30%). These units predominantly use HFC-404A and HFC-410A as refrigerants. HFC-134a is also used for chilled distribution only vehicles. It is reported that the emission leakages from transport refrigeration systems are higher than those from stationary refrigeration because the former operate under more severe conditions (IIR, 2003). The operating environment involves vibration, which will depend on road surface and a wide range of weather conditions and operating temperatures. Annual leakage figures reported are 10–37 percent of the refrigerant charge (IPCC/TEAP 2005). A study reported by Koehler et al. (2003), which assumed a 10 percent leakage rate showed the direct emissions (refrigerant leakage) from the

refrigeration system to be 21 percent of indirect emissions (engine fuel consumption) for HFC-404A and 13 percent for HFC-410A.

Due to the country-specific variation in the amount of freight transported as well as the type of vehicles used (see UNECE 2010; Eurostat 2010; OECD 2010; USDOT 2010), GAINS derive HFC consumption per unit of freight transportation in 2005 based on the consumption reported by countries for this source to the UNFCCC. Figure S4 presents the HFC consumption in refrigerated transport sector per unit freight transportation in 2005 as reported by Annex-I countries to UNFCCC (2012). For countries not reporting HFC consumption specific for this sector, the rate reported for Austria (2.5 kg HFC per million tonne-km of freight transported) is adopted as default. Projections of HFC consumption in refrigerated transport follow proportionately growth in GDP (Capros et al., 2013; IEA/OECD, 2012). HCFC consumption in the refrigerated transport sector of China in 2009-10 and India in 2005 was 1.08 and 0.23 tonne HCFC per unit GDP, respectively (UNEP, 2011a; MoEF 2009). Due to the unavailability of HCFC consumption data for other developing countries, we adopt the Chinese and Indian value as default for HCFC consumption in the refrigerated transport sector of developing countries in general.

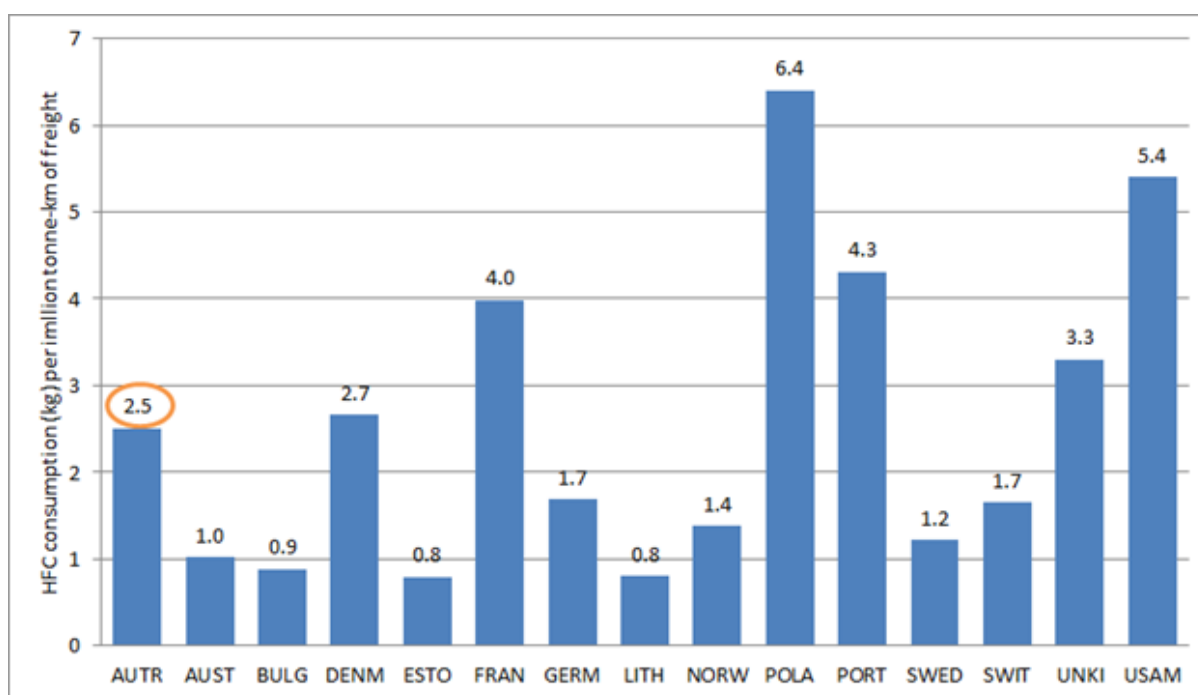

**Figure S4. HFC consumption in refrigerated transport (in kg) per unit freight transportation (million tonne-km) in 2005 for Annex-I countries**

Source: UNFCCC (2012)

An annual leakage rate of 25 percent for industrialized and 30 percent for developing countries (Gschrey et al., 2011) from refrigerated transport equipment in use is applied consistently across all GAINS regions. At the end-of-life the scrapped equipment is assumed to be fully loaded with refrigerant which needs recovery with recycling or destruction.

The control options available for this source are different good practice options including leakage control, improved components and end-of-life recollection. These options are assumed to remove 20 percent of emissions banked in equipment in use and 80 percent of scrapping emissions (Tohka, 2005). Further emission reductions

from this source can be achieved through switches to alternative refrigerants like hydrocarbons (HC-290, HC-600a, etc.), CO<sub>2</sub> and NH<sub>3</sub>. HFOs (i. e. HFO-1234yf blends) are also under consideration for use across transport refrigeration modes (USEPA, 2015).

### ***S2.1.7 Mobile air-conditioning***

A major source of F-gas emissions from the transport sector is emissions from mobile air-conditioners (MAC). Air conditioning in cars became common in the United States in the 1960s. Mass installation in Europe and developing countries started only later, around 1995. The refrigerant currently used in MACs is HFC-134a. The emissions of HFC-134a take place during accidents, through leakage and servicing and at disposal. Global recovery rates are generally low (DeAngelo et al. 2006), except for the EU where end-of-life recollection has been mandatory since 2000 due to the Directive on end-of-life vehicles (EC 53/2000).

In the GAINS model, emissions from MAC are accounted for in cars, light and heavy duty trucks, and buses. The number of vehicle types in different GAINS regions is extracted from the GAINS model and consistent with transport fuel use in respective external energy scenario. The penetration rates for air-conditioners in different vehicle types is extracted from a detailed literature review (Kanwar, 2004; Hu et al., 2004; IPCC/TEAP 2005; CSI 2009; Rhiemeier and Harnisch, 2009; Uherek et al. 2010; Henne et al., 2012; Yan et al. 2014; Su et al., 2015). Using the average charge size for different vehicle types the HFC consumption in the mobile air-conditioning sector is estimated (Repice and Schulz, 2004; IPCC/TEAP, 2005). Average charge sizes used are 0.6 kg for cars, 1.2 kg for light and heavy duty trucks and 12 kg for buses (Tohka, 2005; Schwarz et al., 2011). The leakage rate assumed from MAC in use is 10 percent (Tohka, 2005) and at the end-of-life the scrapped MAC is assumed to be fully loaded with coolant which needs recovery, recycling or destruction.

Following adherence to the MAC Directive-2006/40/EC, HFC-134a is expected to be replaced by a low GWP substance (GWP<sub>100</sub> < 150) in all new models put on the market from January 2011 onwards. There are a few possible alternatives to HFC-134a including replacement with CO<sub>2</sub> (GWP<sub>100</sub>=1), HFO-1234yf (GWP<sub>100</sub>=4) or HFC-152a (GWP<sub>100</sub>=124) (Yoo and Lee, 2009; Henne et al., 2012; Wang, 2014; Lee, 2015). However, the high system pressure and comparatively low efficiency of CO<sub>2</sub> and the flammability of HFC-152a make HFO-1234yf as the front runner of this race (Akasaka et al., 2010).

Evidence for mobile air conditioners from the B-COOL (2011) project funded by the EU Sixth Framework Program suggests that the cost of a CO<sub>2</sub>-based AC system is between 1.5 to 2 times the costs of a HFC-134a system. Moreover, CO<sub>2</sub>-based systems show slightly higher fuel consumption at higher thermal load (35 °C) as compared to the HFC-134a system. This is in contrast to the fuel (diesel/gasoline) savings claimed by some CO<sub>2</sub> promoters (e.g., [www.r744.com](http://www.r744.com)). As a compromise we do not assume any effect on energy consumption when switching to a CO<sub>2</sub> based system in stationary or mobile air conditioners.

### ***S2.1.8 Foams***

#### ***Polyurethane one component foam (OC)***

Foams became a significant application of HFCs as part of the phasing-out of CFCs under the MP. HFCs are used as blowing agents in a solidifying matrix of a polymer (UNEP, 2006). The main application of polyurethane (PU)

one component (OC) foam is to fill cavities and joints when installing inner fixtures in housing constructions. Since one component foams come in pressurized canisters and cylinders, they are also called aerosol foams. One component blowing agents are typically gaseous and function as propellant for the foam. They volatilize upon application, except for small residues that remain for at most one year in the hardened foam. From early 2003, HFC-365mfc has been commercially produced as a substitute for foam blowing agent HCFC-141b, whose use in Europe has been banned since January 2004 (Stemmler et al., 2007).

To estimate emissions from one component foams we adopt HFC consumption in OC foams as reported by Annex-I countries to the UNFCCC (2012) for year 2005 and 2010. When reporting is missing for this source, the Swiss consumption per unit GDP (6.8 tonne HFC per billion Euro GDP) is adopted as default. Figure S5 presents the HFC consumption in one component foam sector per unit GDP in 2005 for Annex-I countries. HCFC consumption in OC foam sector of China and India in 2005 was 3.7 and 0.8 tonne HCFC per unit GDP, respectively (UNEP, 2011; MoEF 2009). Due to the unavailability of HCFC /HFC consumption data for other developing countries, we adopt the Chinese and Indian value as default for HCFC/HFC consumption in the refrigerated transport sector of developing countries in general. Projections of blowing agents for the one component foam sector follow growth in GDP (PRIMES baseline scenario (Capros et al., 2013; IEA/OECD, 2012)).

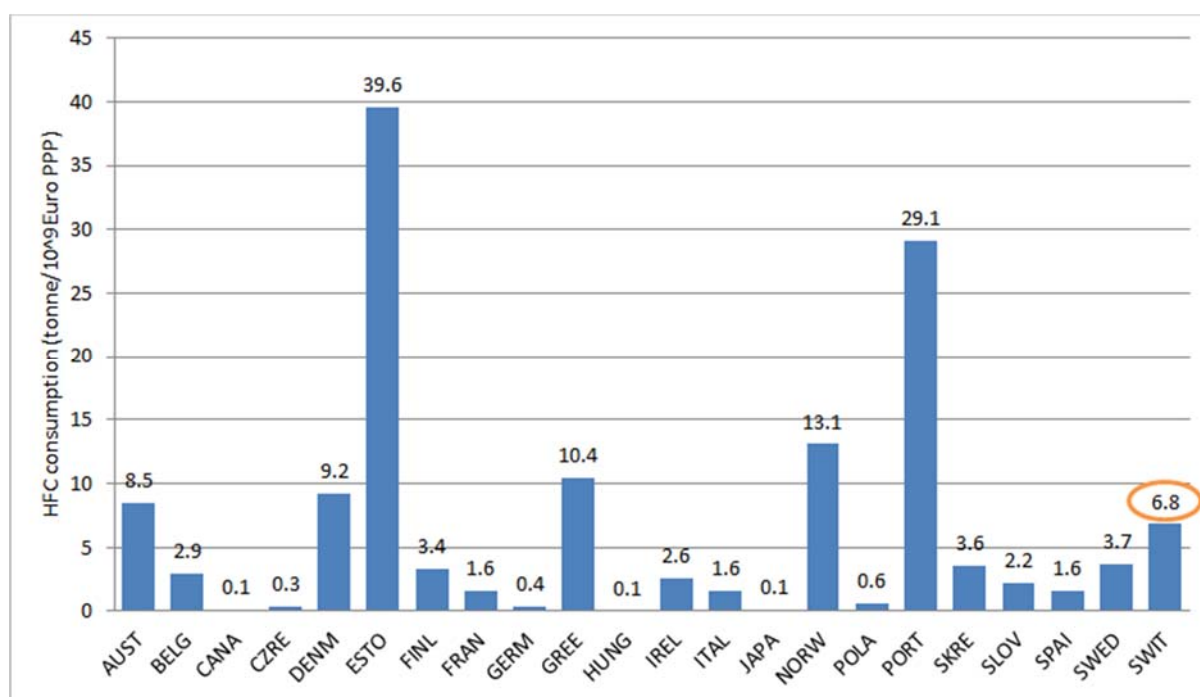

**Figure S5. HFC consumption in one component foam sector per unit GDP in 2005 for Annex-I countries**

Source: (UNFCCC 2012)

The annual release of HFCs from foams is assumed 15 percent of the stock banked in foams (UNFCCC, 2012; Höglund-Isaksson et al., 2013). Emissions from foams can be controlled by replacing HFC-134a and other high GWP blends (i. e. HFC-245fa, HFC-365mfc, etc.) with alternative low GWP blowing agents, like HFC-152a, hydrocarbons or CO<sub>2</sub>. A recent mitigation option for applications where high pressure is essential is the replacement with HFO-1234ze (GWP<sub>100</sub>=6) (Carvalho et al., 2014; Vollmer et al., 2015).

The EU F-gas Regulation requires that all EU member states from 2008 stop using HFCs in OC foam unless this is required to meet national safety standards. The most common current replacement options for HFCs in foams are hydrocarbons and CO<sub>2</sub>. For some applications the performance of CO<sub>2</sub> in foam blowing is limited (UNEP, 2010). In GAINS, the options considered available for replacement of HFCs in one component foams are CO<sub>2</sub>, different hydrocarbons like propane and butane, and HFO-1234ze.

### ***Other foams (OF)***

The sector for other foams (OF) in the GAINS model includes about 10 different polyurethane foam types (viz. PU appliances, PU/PIR/Phen laminates, PU disc panel, PU cont panel, PU blocks, PU spray, PU pipe, XPS) and extruded polystyrene (XPS). It is difficult to estimate product life emissions and lifetime of the foam product. End of life emissions depend greatly on the end of life treatment. If the product is land filled, the emission factor depends mainly on the properties of the plastic. If the product is recycled, all gases can be emitted into the atmosphere if fugitive emissions during the recycling process are not incinerated or collected. If the product is incinerated, the emission factor can be close to zero, depending on the incineration temperature. To estimate emissions from the other foam sector we adopt HFC consumption in other foams as reported by Annex-I countries to the UNFCCC for years 2005 and 2010. For countries not reporting HFC consumption from this source, an average factor of 0.58 tonne HFC per billion Euro GDP is adopted as default. HCFC consumption in OC foam sector of China and India is taken from (UNEP, 2011) and (MoEF, 2009) respectively. Projections of refrigerants for one component foam sector follow GDP as taken from (Capros et al., 2013; IEA/WEO, 2012). The annual release of HFCs from foams is assumed 15 percent of the stock banked in foams (UNFCCC, 2012; Höglund-Isaksson et al., 2013).

Emissions from foams can be controlled by replacing HFC-134a and other high GWP blends with an alternative blowing agent like CO<sub>2</sub>, water, hydrocarbons like propane or butane. According to Harvey (2007) a water/CO<sub>2</sub> mixture has been used in Europe (with a 10 to 20 percent market share by 2000) for solid PU in building applications. Approximately, 80 percent of XPS board foams in the EU use CO<sub>2</sub> for foam blowing however, CO<sub>2</sub> has some limitations with respect to thermal resistance and product thickness (UNEP, 2010). The remaining 20 percent will therefore need to use some other alternative, e.g., a mix of HFCs, HCs and water could be possible, but also HFO-1234ze is an interesting possible option (UNEP, 2010). In GAINS, the options considered available for replacement of HFCs in OF foams are CO<sub>2</sub>, HFC-152a, different hydrocarbons like propane and butane, and HFO-1234ze.

### ***S2.1.9 Aerosols***

HFC is used as propellant for aerosols released from cans and metered dose inhalers, e.g., medical asthma inhalers. Following the MP, the use of CFCs as propellants in aerosol cans and metered dose inhalers (MDIs) are being replaced by other propellants. In the EU, the use of HFCs as propellant for aerosols in all applications for entertainment and decorative purposes has been prohibited since 2008 (Höglund-Isaksson et al., 2013). The release from this source is therefore mainly from MDIs, where high pressure is essential and the approval of new medical drugs is very expensive and time-consuming (UNEP, 2010; UNEP, 2015c). We assume that for the EU, the current use of HFCs in MDIs is limited to severe cases and that the primary gases used are HFC-134a with some use of HFC-152a. To estimate HFC consumption in aerosols, we adopt the HFC consumption reported by

Annex-I countries to the UNFCCC for years 2005 and 2010. According to this information the HFC use in aerosols in some countries is not exclusive to HFC-134a and HFC-227ea ( $GWP_{100}=3220$ ). Instead, a certain fraction (20 percent in Canada, 68 percent in Japan, 14 percent Luxembourg and 2 percent in Hungary) refers to the use of other low GWP alternatives such as HFC-152a. Figure S6 presents the HFC consumption (t HFC/million people) in aerosol sector in 2005 for Annex-I countries. HFC consumption in aerosol sector of China and India is taken from (UNEP, 2011) and (MoEF, 2009) respectively. Population growth is used as driver for future HFC use in aerosols (EPC/DG ECFIN, 2012; IEA/OECD, 2012).

The primary alternatives to HFC-134a as propellant in MDI's are dry powder inhalers (DPI), hydrocarbons and HFC-152a ( $GWP_{100} = 140$ ). The relative cost of these options is similar to the cost of MDIs in developed countries (UNEP, 2010), however, for medical reasons MDIs are still preferred in severe cases. For severe cases, where high pressure is essential, there is the option to replace HFC-134a with HFO-1234ze ( $GWP_{100}$  of 6), which according to the manufacturer Honeywell is already available for use as propellant for aerosols.

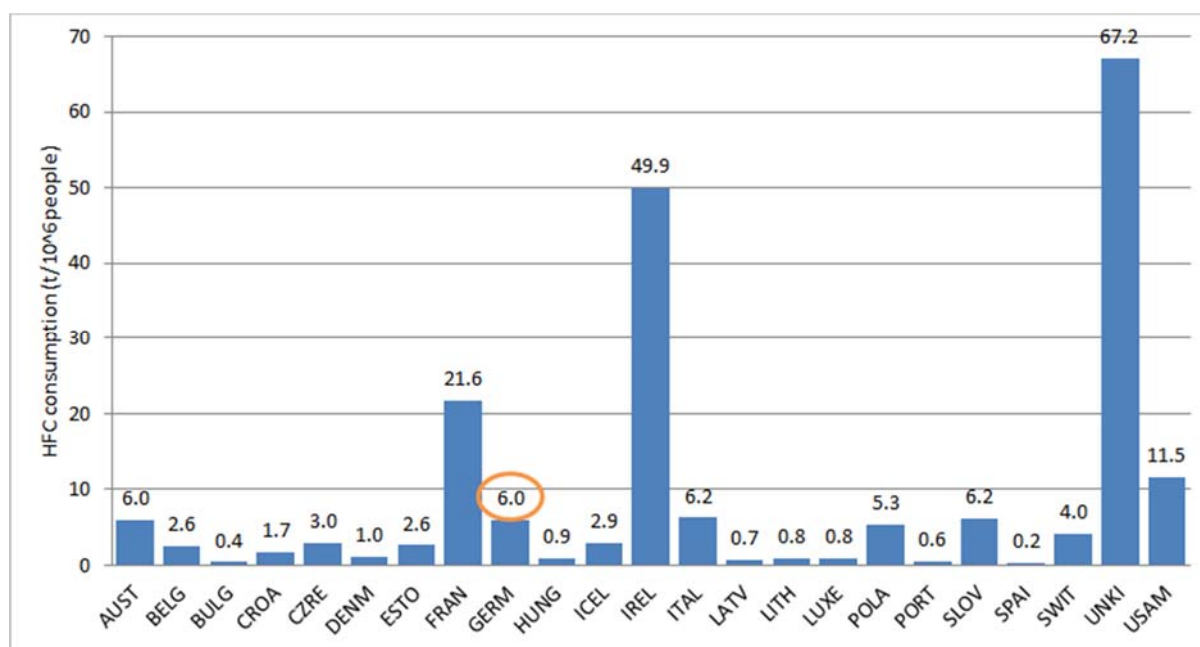

**Figure S6. HFC consumption in aerosol sector (tonne/million people) in 2005**

Source: (UNFCCC, 2012)

### ***S2.1.10 HCFC-22 production***

HCFC-22 (chlorodifluoromethane) is a hydrochlorofluorocarbon (HCFC) used in refrigeration and air-conditioning systems, in foam manufacturing as a blend component of blowing agents, and in the manufacturing of synthetic polymers. Since it is an ODS its release is regulated in the MP. The phase-out schedule of HCFCs in the latest revision of the MP (UNEP, 2007) is presented in Table S3 for Article 5 (developing) and non-Article 5 (developed) countries. In addition to the phase-out of the use of HCFCs, the MP also requires the production and sales of HCFC-22 for emissive use to end completely by 2040.

In contrast to production of HCFC-22 for emissive use, the production and use of HCFC-22 as feedstock in industry is not regulated in the MP as it does not contribute to emissions of HCFCs. Production of HCFC-22 is



however a source of HFC-23 emissions, which is a strong greenhouse gas with GWP<sub>100</sub> of 14,800 times that of CO<sub>2</sub> (IPCC, 1997). HCFC-22 production data is extracted from the Data Access Centre of the UNEP Ozone Secretariat (UNEP, 2013). HCFC-22 production for feedstock use in industry has increased significantly in Article-5 (developing) countries in the last decade. The market production of HCFC-22 in China increased from 106 kt in 2001 to 269 kt in 2005 with an average annual growth of 26.2 percent. HCFC-22 consumption for feedstock use increased with an average annual growth reaching 39.2 percent from 2001 to 2005 (Feroohar, 2007).

**Table S3: Phase-out schedule of HCFCs for emissive use in the Montreal protocol**

| Year | Article 5 (developing) countries |                          | Non-Article 5 (developed) countries |                          |
|------|----------------------------------|--------------------------|-------------------------------------|--------------------------|
|      | Pre 2007 revision of MP          | Post 2007 revision of MP | Pre 2007 revision of MP             | Post 2007 revision of MP |
| 1996 |                                  |                          | Freeze in emissions                 |                          |
| 2004 |                                  |                          | -35%                                |                          |
| 2010 |                                  |                          | -65%                                | -75%                     |
| 2013 |                                  | Freeze in emissions*     |                                     |                          |
| 2015 |                                  | -10%                     | -90%                                | -90%                     |
| 2016 | Freeze in emissions              |                          |                                     |                          |
| 2020 |                                  | -35%                     | -99.5%                              | -99.5%                   |
| 2025 |                                  | -67.5%                   |                                     |                          |
| 2030 |                                  | -97.5%                   | -100%                               | -100%                    |
| 2035 |                                  |                          |                                     |                          |
| 2040 | -100%                            | -100%                    |                                     |                          |

\*at average of 2009 and 2010 level

Source: UNEP (2007)

To calculate HFC-23 emissions from HCFC-22 production, GAINS applies an IPCC default emission factor of 3 percent related to the volume of HCFC-22 production for emissive (HCFC22\_E) and feedstock (HCFC22\_F) applications (IPCC/TEAP, 2005). Activity data are based on reported production levels for historic years (UNEP, 2012) and UNEP's phase out schedule for HCFC products for future years (UNEP, 2007). Projections of HCFC-22 production for feedstock use are assumed to grow proportionately with value added in manufacturing industry.

HFC-23 emissions from HCFC-22 production can be almost eliminated through post combustion during which HFC-23 is oxidized to carbon dioxide, hydrogen fluoride (HF) and water. The marginal abatement cost for destruction of HFC-23 emissions from HCFC-22 production is very low, less than 1 Euro/tCO<sub>2</sub>eq (Schneider 2011; IPCC/TEAP 2005). HFC-23 emissions from HCFC-22 production are assumed fully controlled in OECD countries through post-combustion. In this analysis we assume that the impact of CDM on emissions from HCFC-22 production in developing countries remain at the current level in the future (Fenhann, 2014).

### ***S2.1.11 Ground source heat pumps***

Geothermal energy is a renewable energy resource that can be used to provide electricity, heating, and cooling of commercial and domestic buildings and other facilities (IPCC, 2011). Geothermal heat pumps or ground source heat pumps (GSHP) are systems combining a heat pump with a ground heat exchanger (closed loop systems) or being fed by ground water from a well (open loop systems). The earth is used as a heat source when operated in heating mode, with a fluid as the medium which transfers the heat from the earth to the evaporator of the heat pump, thus utilizing geothermal energy (Sanner et al., 2003). In cooling mode, heat pumps use the earth as a heat

sink. With borehole heat exchangers (BHE), geothermal heat pumps can offer both heating and cooling at virtually any location, with great flexibility to meet demands.

In Europe, the growth in GSHP systems has been accelerated by national policies stimulating installation, e.g., through subsidies, efficiency standards to new buildings and heating demand mandates for heat pumps (Euroobserver. 2009). Many European countries have identified barriers that mirror those seen in the United States, namely higher investment costs, lack of knowledge and awareness among end users, and underdeveloped institutional and financial support (EHPA, 2008). In the EU, Sweden (>320,000) and Germany (>150,000) today show the highest absolute numbers of GSHPs as shown in Figure S7.

Lund et al. (2011) estimated installed capacity of direct use geothermal in 2009 at 51 GW<sub>th</sub>, distributed in 78 countries, while Goldstein et al. (2011) estimated direct use at 60 GW<sub>th</sub> at the end of 2009. Direct use (ranging from 60 to 120°C) by type and relative estimates as given by Lund et al. (2011) were space heating (63%), bathing and balneology (25%), process heating and agricultural drying (3%), aquaculture (fish farming) (3%) and snow melting (1%). GSHP contributed to 70% (35.2 GW<sub>th</sub>) of the global installed geothermal heating capacity in 2009 (Ogola et al., 2012) and is the fastest growing of all forms of geothermal direct use since 1995 (Rybach 2005; Blum et al., 2010; Thorsteinsson and Tester, 2010; Yang et al., 2010; Heiskanen al., 2011; Lund et al. 2011; Schimschar et al. 2011). Although, most of the installations occur in North America, Europe, and China, the number of countries with installation increased from 33 in 2005 to 43 in 2010. The equivalent number of installed 12 kW units (typical of US and Western European homes) is approximately 2.76 million (Lund et al., 2011).

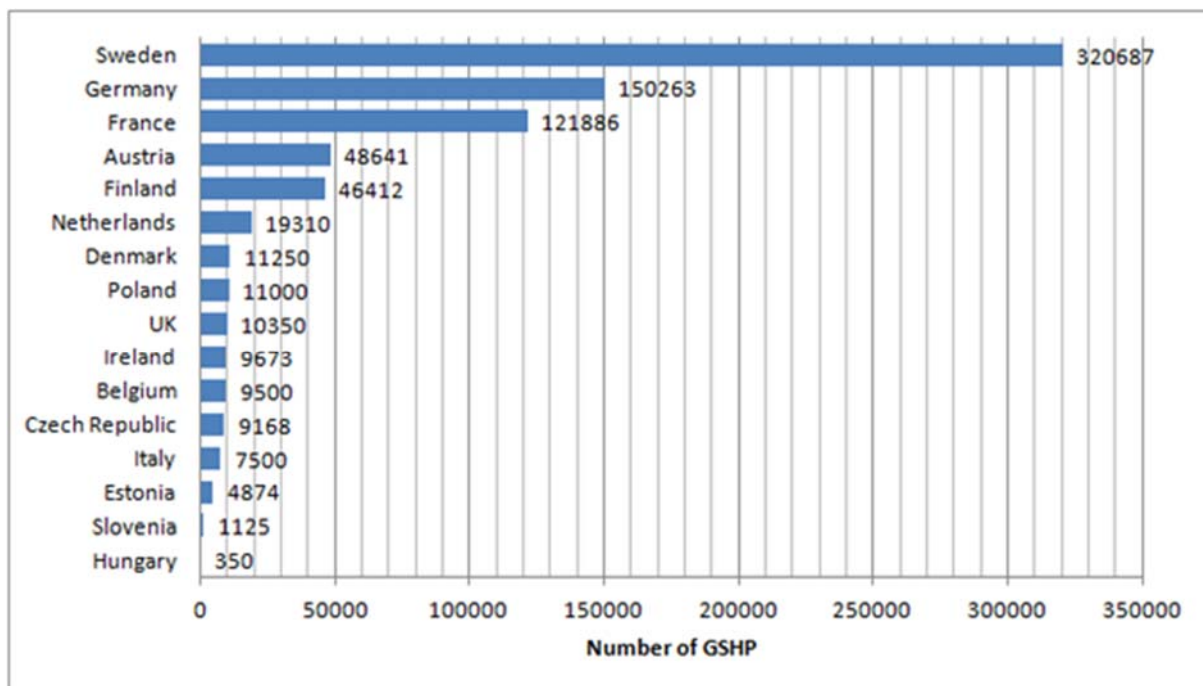

**Figure S7: Number of existing GSHPs (with more than 10 MW heat capacity) in Europe**

Source: EGEN (2009)

To estimate HFC consumption in the GSHP sector in the GAINS model we have taken the global GSHP installed capacity from Lund et al. (2005) and Lund et al. 2011), Euroobserver (2009), EHPA (2010) and Bayer et al. (2012). For projections, it is assumed that the annual growth in GSHPs using HFCs follows the growth of solar heating

in the domestic sector as provided by the PRIMES model for EU-28 countries and IEA/OECD (2012) for non-EU-28 countries, but with the additional assumption that the market is saturated when the number of heat pumps corresponds to 20 percent of the number of households in a country. Growth in solar heating is here used as an approximation for the general growth in renewable energy sources. This is a rather crude assumption, which would be desirable to improve in the future through better information about the possibilities and limitations of expanding GSHP use in the different regions. Based on available technical information, the current fluid/refrigerant used in GSHP is most likely HFC-410A (IPCC/TEAP, 2005; Johnson, 2011) in Annex-I and HCFC-22 in non-Annex-I countries. An average refrigerant charge of 0.22 kg HFC per kW installed capacity (Schwartz et al., 2011) is used to estimate the HFC consumption in GSHP sector. Annual leakage from equipment is assumed 2.5 percent per year. Emissions can be controlled through good practice options and switching to alternative substances. . GAINS considers HC-290 direct, CO<sub>2</sub> and HFO-1234yf as a key alternatives for HFC-410A use in GSHP.

### ***S2.1.12 Fire extinguishers***

Fire extinguisher, or extinguisher, is an active fire protection device used to extinguish or control small fires, often in emergency situations. The extinguishing agent is stored in a container and released in case of fire. Unlike in the refrigeration and air conditioning sector, on site refilling and on site recycling do not take place. After intended release in the event of fire or in case the equipment is malfunctioning (leakage, pressure drop), the containers are returned to the manufacturers. Re-charging, repair work and recovery is always done off site by specialist personnel. As long as the extinguishing agent is contained, it does not get polluted by impurities, and reclamation is not relevant. The industry points out that recovery and recycling of F-gas fire extinguishing agents has been only carried out to a small extent, since HFCs in fire protection have only been in use since the mid-1990s. As the lifetime is 15 years or longer, most systems are still in use (Schwarz et al., 2011).

HFCs were not used in fire protection before the MP. Their current, and growing, usage is a direct result of their adoption as halon alternatives, despite being inferior to halons both in terms of cost and performance (IPCC/TEAP, 2005). To estimate HFC consumption in fire extinguishers, we derive consumption rates per unit of GDP using HFC consumption reported by Annex-I countries to UNFCCC (2012) for year 2005 and 2010 (see: Figure S8). In absence of data that could explain great fluctuations in this rate between countries, we adopt reported values when available and use the average factor of 0.68 ton per billion Euro GDP as a default factor for all countries for which reported consumption is missing. Projections of refrigerants for fire extinguishers sector follow GDP until 2050 as taken from the PRIMES baseline 2012 (Capros et al., 2013) for EU-28 and IEA/OECD (2012) for non-EU countries.

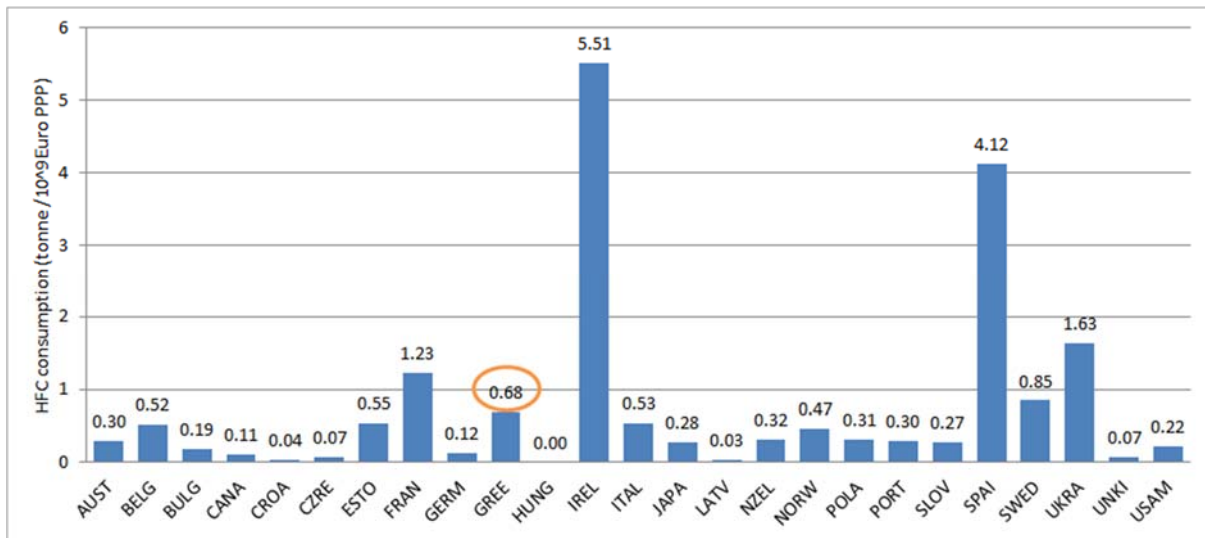

**Figure S8. HFC consumption in fire extinguishers per unit GDP in 2005 for select countries**

Source: UNFCCC (2012)

Figure S9 presents the share of HFC's and PFC's used in fire protection sector as reported by Annex-I countries for 2005 (UNFCCC, 2012). It is observed that HFC-227ea (54%), HFC-23 (23%), HFC-125 (13%) and HFC-236fa (7%) are mostly used for fire extinguishers in Annex-I countries. The majority of emissions will occur when the system is discharged, either when triggered accidentally or during a fire. Emissions may also occur during filling or maintenance of the systems; however these emissions are very small in newer systems, which often have leak detection and alarm systems as standard. Emissions are estimated to range from 1 to 3% of the fixed-system bank and 2 to 6% of the portable extinguisher bank per year (IPCC/TEAP, 2005). Annual leakage from equipment in GAINS is assumed 3.5 percent per year.

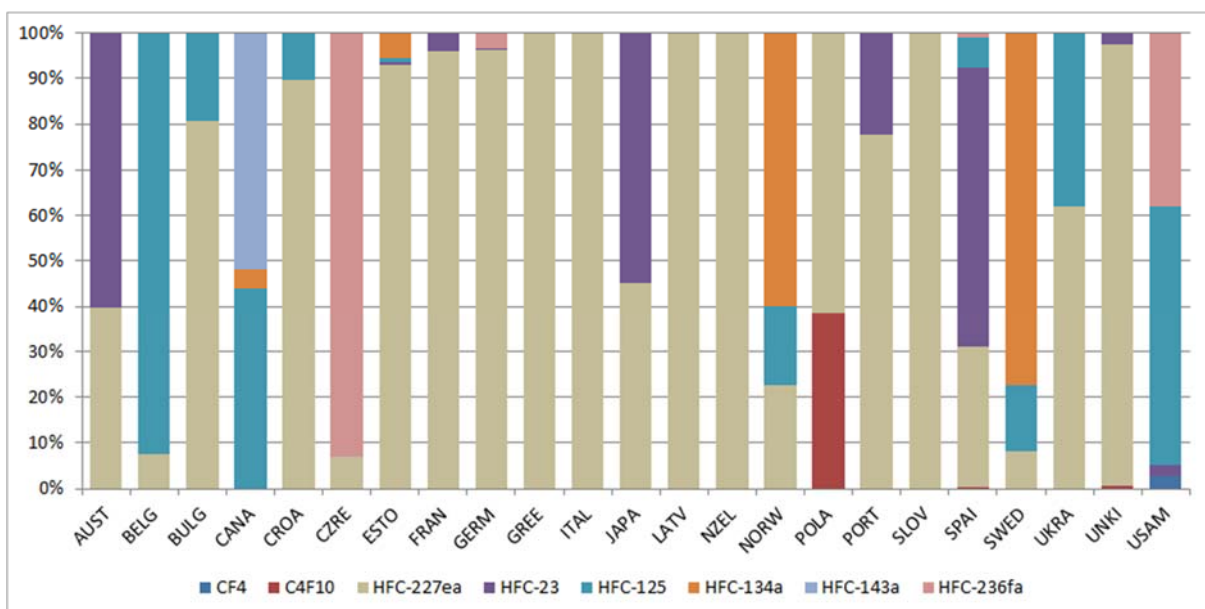

**Figure S9. Share of HFC/PFC in fire protection sector of Annex-I countries in 2005**

Emissions can be controlled through good practice options and switching to alternative substances. In recent years a low GWP alternative fluid ( $GWP_{100} = 1$ ) with equivalent extinguishing properties had been introduced to the

market with still growing success (Defra, 2008), the perfluoro-ketone FK 5-1-12 (Novec™ 1230). Its manufacturer and most European specialist equipment distributors rate FK 5-1-12 to be a feasible substitute for almost all applications of HFCs – for both HFC-227ea and HFC-23. GAINS considers FK-5-1-12 a key alternatives for HFC's in the fire extinguisher sector. In EU-28, fixed fire extinguisher systems are fully subject to the measures according to Art 3 and 4 of the F-gas Regulation. In developing countries, the Firefighting Sector phased out use of CFCs under the MP. The conversion technologies used were FM200, ABC powder, CO<sub>2</sub>, etc. (MoEF, 2009).

### ***S2.1.13 Solvents***

F-gas based solvents are mainly used for degreasing of metal prior to precision coating and in the optics and electronics sector (Defra, 2008). Specific end-user sectors identified by March study (1999) include dry cleaning, metal cleaning, precision cleaning and electronics cleaning. In recent years, HFCs have been developed that are used for this application in sectors such as aerospace and electronics. CFCs were used as solvents in precision cleaning before being replaced by certain HCFCs, namely HCFC-141-b. As an ozone depleting substance, this HCFC has been replaced by HFC-43-10mee and HFC-c447ef. HFC-43-10mee has an atmospheric life of 15 years and GWP of 1,610 whereas HFC-c447ef has an atmospheric life of 4.3 years with GWP of 250 (IPCC/TEAP, 2005). The more recent HFCs coming onto the market are HFC-245fa and HFC-365mfc which were primarily introduced as foam blowing agents (IPCC/TEAP, 2005). New HFC species and replacements for this sector are Not-in-kind and in-kind alternatives to HCFC and HFC solvents.

To estimate HFC consumption in solvent sector, we adopt the HFC consumption reported by Annex-I countries to the UNFCCC for years 2005 and 2010. Five countries namely, Canada, Czech Republic, France, Switzerland and UK reported HFC consumption in solvent sector in their national communication to UNFCCC in 2005 (UNFCCC, 2012). At present, F-gas based solvents are not applied to a relevant extent with the exemption of France and UK in EU-28. Use of F-gas based solvents is prohibited in Denmark whereas F-gas solvents are not used in Austria, Belgium, Bulgaria, Cyprus, Czech Republic, Estonia, Hungary, Ireland, Lithuania, Latvia, Malta, the Netherlands, Romania, Slovakia, Slovenia, and Sweden (Schwartz et al., 2011).

HFC consumption in solvent sector of China and India is taken from UNEP (2011) and MoEF (2009) respectively. Projections of refrigerants for solvents sector follow GDP until 2050 as taken from the PRIMES baseline 2012 scenario stored in the GAINS model for EU-28 and IEA/OECD (2012) for non-EU-28 countries.

Recovery for recycling or reclamation of F-gas based solvents is unlikely. Therefore, no further mitigation options beyond the ban on F-gas based solvents are considered necessary to control emissions from solvent sector in GAINS model.

## **S2.2 Perfluorocarbon compounds (PFC) emissions**

There are two major sources for emissions of perfluorocarbon compounds (PFCs); primary aluminium (Al) production and the semiconductor industry. Emissions from these sectors have typically very high global warming potentials.

### ***S2.2.1 Aluminium Industry***

Primary Al production has been identified as a major emission source of the two PFCs tetrafluoromethane (CF<sub>4</sub>) with GWP<sub>100</sub> 7,390 and hexafluoroethane (C<sub>2</sub>F<sub>6</sub>) with GWP<sub>100</sub> 12,200 times that of CO<sub>2</sub> (IPCC, 2007b). During normal operating conditions, an electrolytic cell used to produce aluminum does not generate measurable amounts of PFC. PFC is only produced during brief upset conditions known as "anode effects". These conditions occur when the level of aluminum oxide drops too low and the electrolytic bath itself begins to undergo electrolysis. Since the aluminum oxide level in the electrolytic bath cannot be directly measured, surrogates such as cell electrical resistance or voltage are most often used in modern facilities to ensure that the aluminum in the electrolytic bath is maintained at the correct level. The GAINS model uses the production volume of aluminum as the activity driver for calculating emissions from this source. Primary Al production data is taken from external data sources, i.e., from the PRIMES model for the EU countries and from U.S. Geological Survey (USGS, 2013) for non-EU countries. For China and India, primary Al production data is taken from the GAINS Asia project (Amann et al., 2008; Purohit et al., 2010). Four different types of activities are distinguished based on the technology used; point-feeder prebake (PFPB), side-worked prebake (SWPB), vertical stud söderberg (VSS), and center-worked prebake (CWPB) technology. Shares of different Al production technologies were adopted from the Al industry websites, national communications to the UNFCCC (2012) and other publically available literature (Schwarz, 2008; RUSAL, 2009; IAI, 2009; Schwarz et al., 2011; Marks and Rand, 2012; IAI, 2014).

Emission factors depend on the production technology and on a number of site-specific conditions and are taken from Harnisch and Hendricks (2000). Chinese Al production was dominated by Horizontal Stud Soderberg (HSS) technology until the mid-2000s, but through the mid-2000s a transformation occurred and by the end of 2005 the China Non-Ferrous Metals Industry Association (CNIA) reported 100 percent use of PFPB technology. The International Aluminium Institute (IAI) observed a median PFPB emission factor for 8 Chinese smelters 2.6 times larger than the global PFPB technology average (IAI, 2009). Assuming the Chinese EF is constant in time (Mühle et al., 2010) the revised CF<sub>4</sub> emissions factor for Chinese Al smelters is used in this study. Conversion of SWPB, VSS or CWPB technology to PFPB technology removes over 90 percent of PFC emissions, while retrofitting of the three technologies would remove about a quarter of emissions (Harnisch and Hendricks, 2000). Data on mitigation costs is taken from the same source. In Europe, emissions from the primary Al production is regulated under the EU-ETS system, control options with marginal costs falling below the expected ETS carbon price are adopted in the reference scenario. This means that with the natural turn-over of capital, all EU member states will have phased-in PFPB technology by 2020.

The development of inert anodes is sometimes promoted as a promising mitigation option, which could eliminate emissions of PFCs from the electrolysis process (IPCC, 2007a; Kvanne and Drabløs, 2014). In the Energy Technology Perspective (ETP) 2010 by the International Energy Agency (IEA/OECD, 2010), deployment of inert anode technologies is expected to start in 2015-2020 with full commercialization by 2030 (Table S4). If realized,

inert anode technology would have significant energy, cost, productivity, and environmental benefits for the aluminum industry worldwide (RUSAL, 2010). The technology is expected to eliminate PFC emissions from primary Al production altogether. Despite promising initial results, the technology still needs further development before it can be introduced as a viable alternative to PFPB technology. In GAINS, inert anode technology is assumed available as a mitigation option from 2035 onwards, however, no adoption in the reference scenario is assumed.

**Table S4. Technology options for the aluminium industry**

| <b>Technology</b>       | <b>R&amp;D needs</b>                            | <b>Demonstration needs</b>              | <b>Deployment milestones</b>                                                  |
|-------------------------|-------------------------------------------------|-----------------------------------------|-------------------------------------------------------------------------------|
| Wetted drained cathodes | -                                               | Ready for demonstration                 | Deployment to start by 2015 with full commercialization by 2020               |
| Inert anodes            | Extensive testing at laboratory and batch scale | Ready to be demonstrated at plant level | Deployment to start in 2015-2020 with full commercialization by 2030          |
| Carbothermic reduction  | Extensive research under way                    | 2020 - 2025                             | Deployment to start between 2030 and 2040 with full commercialization by 2050 |
| Kaolinite reduction     | Research under way                              | 2025 - 2030                             | Deployment to start between 2035 and 2045                                     |

Source: (IEA/OECD, 2010)

### ***S2.2.2 Semiconductor industry, PFC use in CVD and etching***

The semiconductor industry uses HFC-23, CF<sub>4</sub>, C<sub>2</sub>F<sub>6</sub>, octafluoropropane (C<sub>3</sub>F<sub>8</sub>), carbon tetrafluoride (c-C<sub>4</sub>F<sub>8</sub>), sulphur hexafluoride (SF<sub>6</sub>) and nitrogen trifluoride (NF<sub>3</sub>) in two production processes: plasma etching thin films (etch) and plasma cleaning chemical vapour deposition (CVD) tool chambers (IPCC, 2001). Because PFC is only used by few companies in a country (Tohka, 2005) and because the amount of PFC use allows deriving production volumes, data on PFC use are often confidential. As activity variables for this sector GAINS uses the volume of PFC emissions as reported by Annex-I countries to UNFCCC (2012). For countries not reporting PFC consumption in this sector, the Chinese consumption rate of 6.4 Gg PFC per billion Euro value added in manufacturing sector (Bartos et al., 2008) in 2005 has been adopted as default.

## **S2.3 Sulphur hexafluoride (SF<sub>6</sub>) emissions**

Sulphur hexafluoride emissions arise from high and mid-voltage switches, magnesium production and casting, soundproof glazing and a variety of other applications using SF<sub>6</sub>. Compared to anthropogenic sources, natural sources of SF<sub>6</sub> are negligible. Although the atmospheric concentration of SF<sub>6</sub> is relatively low, contributing 0.1% of the total anthropogenic radiative forcing, the concentration is growing continuously (Levin et al., 2010; Rigby, et al. 2010) because of the compound's long lifetime of ~3200 years (Ravishankara et al., 1993).

### ***S2.3.1 High and mid voltage switches***

The electrical equipment sector is the major emission source of SF<sub>6</sub> through leakage, maintenance, and retiring (IPCC/TEAP, 2005). SF<sub>6</sub> is used as an electrical insulator in the transmission and distribution equipment of electric systems. Most of the SF<sub>6</sub> is stored in gas-insulated switchgears for high and mid-voltage electric networks. Emissions of SF<sub>6</sub> depend on the age of the gas insulated switchgear since older models leak more than newer ones, as well as on the size of the transmission network and on recycling practices of the old equipment. The GAINS model uses electricity consumption as activity variable for this sector. The emission factor for SF<sub>6</sub> in electricity transmission per unit of electricity consumed is taken from the GHG inventory of California (CEPA, 2010) and applied in a consistent manner to all regions.

Suitable alternatives to SF<sub>6</sub> do not exist for these applications as the oil and compressed air systems, which were used previously, suffer from safety and reliability problems (AEAT, 2003). SF<sub>6</sub> emissions resulting from leaks in electrical equipment can be addressed through leak detection and repair (LDAR) and, for larger leaks, refurbishment. SF<sub>6</sub> emissions can be reduced through the adoption of recycling practices of used SF<sub>6</sub> switchgears. The EU F-gas Regulation requires end-of-life recollection and recycling from 2010 onwards. Full compliance with this regulation is assumed in GAINS to apply in all EU countries.

### ***S2.3.2 Magnesium production and magnesium casting***

Casting and production of primary and secondary magnesium are well known sources of atmospheric emissions of SF<sub>6</sub>. The gas is used as a shielding gas in magnesium foundries to protect the molten magnesium from re-oxidizing whilst it is running to best casting ingots (IPCC, 2001). Activity data on historic volumes of processed magnesium are taken from the United States Geological Survey (USGS, 2013), UN statistics and the national communications to UNFCCC (UNFCCC, 2012). An emission factor of 1 kg SF<sub>6</sub> per ton processed metal is taken from Schwartz and Leisewitz (1999) and Tohka (2005). Based on the recently published data, magnesium processing SF<sub>6</sub> consumption factors of 1.65 kg SF<sub>6</sub>/t Mg is used for China (Fang et al., 2013). SF<sub>6</sub> emissions in magnesium production and casting can be substituted by using sulphur dioxide (SO<sub>2</sub>) as alternative gas.

### ***S2.3.3 Soundproof windows***

Some European countries used significant amounts of SF<sub>6</sub> in soundproof windows. From 2006, the F-gas Regulation bans the use of SF<sub>6</sub> soundproof windows. Soundproof windows have a relatively long life-time and it is therefore expected that the stock of SF<sub>6</sub> found in such windows in 2005 will be successively phased-out over a period of 25 years. The available stock of SF<sub>6</sub> in soundproof windows in 2005 in EU countries is estimated at 288 t SF<sub>6</sub> in Austria, 75 t SF<sub>6</sub> in Belgium, 86 t SF<sub>6</sub> in Denmark, 1764 t SF<sub>6</sub> in Germany, 1.78 t SF<sub>6</sub> in Slovenia, and



11.1 t SF<sub>6</sub> in Sweden (Hoglund-Isaksson et al., 2013). These estimates were verified in national communications between IIASA and country experts as part of review processes of baseline non-CO<sub>2</sub> GHGs organized by the European Commission in 2009 and 2012. With an assumed leakage/refill rate of 1 percent per year for windows still in use and a linear phase-out of emissions, annual emissions from this source until 2030 (when phase-out is completed) are estimated as:

$$E_t^{SF_6} = \frac{Stock_{2005}}{25} + Stock_t * 0.01 \quad (6)$$

where the first term represents the end-of-life emissions from soundproof windows scrapped in year t and the latter term represents the emission leakage from windows still in use.

No further mitigation options beyond the ban included in the F-gas Regulation are considered necessary to control emissions from soundproof windows.

#### ***S2.3.4 Other applications***

SF<sub>6</sub> have been used in tyres, sports equipment manufacturers in tennis balls and sport shoes. Activity data for these other sources of SF<sub>6</sub> emissions in Annex-I countries are taken from emissions reported by countries to the UNFCCC (2012). From 2006, the F-gas Regulation bans the use of SF<sub>6</sub> in sports equipment and tyres in EU-28. GAINS assumes all EU-28 countries adhere fully to this ban. For developing countries, information on SF<sub>6</sub> consumption in other applications is missing.

**Table S5. GAINS F-gas emission sources, activity data and drivers**

| S.No.                   | Emission source                       | Historical activity data                                                                                                                                                                                                             | Projection driver                                                                                                    |
|-------------------------|---------------------------------------|--------------------------------------------------------------------------------------------------------------------------------------------------------------------------------------------------------------------------------------|----------------------------------------------------------------------------------------------------------------------|
| <b>A. HFC emissions</b> |                                       |                                                                                                                                                                                                                                      |                                                                                                                      |
| 1                       | Aerosols                              | HCFC/HFC consumption for MDI's and other aerosols (MoEF, 2009; UNEP, 2011; UNFCCC, 2012)                                                                                                                                             | Growth in population from PRIMES (2012) for EU-28 and IEA/OECD (2012) for non-EU-28 countries                        |
| 2                       | Commercial air conditioning           | GDP and population (PRIMES, 2012; IEA/OECD, 2012), household size (UN-Habitat 2005), cooling degree days (Baumert and Selman, 2003), commercial floor space (Cofala et al., 2009), refrigerant charge (Höglund-Isaksson et al. 2013) | Growth in GDP and population from PRIMES (2012) for EU-28 and IEA/OECD (2012) for non-EU-28 countries                |
| 3                       | Commercial refrigeration              | HCFC/HFC consumption in the commercial sector (MoEF, 2009; UNEP, 2011; UNFCCC, 2012)                                                                                                                                                 | Growth in commercial value added from PRIMES (2012) for EU-28 and IEA/OECD (2012) for non-EU-28 countries            |
| 4                       | Domestic small hermetic refrigerators | GDP and population (IEA/OECD, 2012), household size (UN-Habitat 2005), urbanization and electrification rate (IEA-WEO Reports, National Census and World Bank surveys)                                                               | Growth in GDP and population from PRIMES (2012) for EU-28 and IEA/OECD (2012) for non-EU-28 countries                |
| 5                       | Fire extinguishers                    | HCFC/HFC consumption in fire extinguishers (MoEF, 2009; UNEP, 2011; UNFCCC, 2012)                                                                                                                                                    | Growth in GDP from PRIMES (2012) for EU-28 and IEA/OECD (2012) for non-EU-28 countries                               |
| 6                       | Ground source heat pumps*             | Geothermal (direct-use) data (Lund et al., 2011), specific refrigerant charge (Schwartz et al. 2011)                                                                                                                                 | Growth in solar thermal energy use in residential sector from PRIMES (2012) and IEA/OECD (2012).                     |
| 7                       | HCFC-22 production for emissive use   | HCFC production (UNEP, 2012)                                                                                                                                                                                                         | Growth in industrial value added from PRIMES (2012) for EU-28 and IEA/OECD (2012) for non-EU-28 countries            |
| 8                       | HCFC-22 production for feedstock use  | HCFC production (UNEP, 2012; IPCC, 2006)                                                                                                                                                                                             | Growth in industrial value added from PRIMES (2012) for EU-28 and IEA/OECD (2012) for non-EU-28 countries            |
| 9                       | Industrial refrigeration              | HCFC/HFC consumption in industrial refrigeration (MoEF, 2009; UNEP, 2011; UNFCCC, 2012)                                                                                                                                              | Growth in industrial value added from PRIMES (2012) for EU-28 and IEA/OECD (2012) for non-EU-28 countries            |
| 10                      | Mobile air conditioning               | Number of vehicles (cars, buses, light and heavy duty trucks) with air conditioning (GAINS model; Tohka, 2005; Höglund-Isaksson et al., 2009).                                                                                       | Growth in vehicles numbers from GAINS model and penetration of MAC from (Tohka, 2005; Höglund-Isaksson et al., 2009) |
| 11                      | Foam                                  | HCFC/HFC consumption in the foam sector (MoEF, 2009; UNEP, 2011; UNFCCC, 2012)                                                                                                                                                       | Growth in GDP from PRIMES (2012) for EU-28 and IEA/OECD (2012) for non-EU-28 countries                               |
| 12                      | Residential air conditioning          | GDP and population (PRIMES, 2012; IEA/OECD, 2012), household size (UN-Habitat 2005), cooling degree days (Baumert and Selman, 2003), refrigerant charge (Höglund-Isaksson et al. 2013)                                               | Growth in GDP and population from PRIMES (2012) for EU-28 and IEA/OECD (2012) for non-EU-28 countries                |

|                                    |                                            |                                                                                                                   |                                                                                        |
|------------------------------------|--------------------------------------------|-------------------------------------------------------------------------------------------------------------------|----------------------------------------------------------------------------------------|
| 13                                 | Refrigerated transport                     | HCFC/HFC consumption in refrigerated transport sector (MoEF, 2009; UNEP, 2011; UNFCCC, 2012)                      | Growth in GDP from PRIMES (2012) for EU-28 and IEA/OECD (2012) for non-EU-28 countries |
| 14                                 | Solvents                                   | HCFC/HFC consumption in solvents (MoEF, 2009; UNEP, 2011; UNFCCC, 2012)                                           | Growth in GDP from PRIMES (2012) for EU-28 and IEA/OECD (2012) for non-EU-28 countries |
| <b>B. PFC emissions</b>            |                                            |                                                                                                                   |                                                                                        |
| 15                                 | Primary Al production                      | Primary Al production data from PRIMES model, U.S. Geological Survey and GAINS Asia Project.                      | Energy consumption in non-ferrous metals from IEA/OECD (2012)                          |
| 16                                 | Semiconductor industry                     | PFC emissions in semiconductor industry (Bartos et al., 2008; UNFCCC, 2012)                                       | Growth in industrial value added from IEA/OECD (2012)                                  |
| <b>C. SF<sub>6</sub> emissions</b> |                                            |                                                                                                                   |                                                                                        |
| 17                                 | High and mid voltage switches              | Electricity consumption (GAINS model)                                                                             | Electricity consumption from IEA/OECD (2012)                                           |
| 18                                 | Magnesium production and magnesium casting | Magnesium production data from PRIMES Model for EU-28; GAINS model and U.S. Geological Survey for non-EU regions. | Energy consumption in non-ferrous metals from IEA/OECD (2012)                          |
| 19                                 | Soundproof windows                         | SF <sub>6</sub> emissions from soundproof windows (Höglund-Isaksson et al., 2010).                                | GDP growth from IEA/OECD (2012)                                                        |
| 20                                 | Other SF <sub>6</sub> emissions            | Other SF <sub>6</sub> emissions from (UNFCCC, 2012)                                                               | GDP growth from IEA/OECD (2012)                                                        |

*\*For regions without solar thermal/renewable use in residential sector growth in GDP is considered as a projection driver.*

**Table S6. Mitigation options for HFC emissions considered in the GAINS model**

| Sector description                                                       | Technology description                                                                            | Unit of activity data | Removal efficiency | Cost parameters per unit of activity data |            |                         |                    |                                        |
|--------------------------------------------------------------------------|---------------------------------------------------------------------------------------------------|-----------------------|--------------------|-------------------------------------------|------------|-------------------------|--------------------|----------------------------------------|
|                                                                          |                                                                                                   |                       |                    | Lifetime of equipment                     | Investment | Operation & maintenance | Electricity demand | Labour time                            |
|                                                                          |                                                                                                   |                       |                    | years                                     | million €  | million €/year          | GWh                | fraction of annual work hrs (1800 hrs) |
| Aerosols                                                                 | Alternative hydrocarbon propellant (i. e. propane (HC-290), iso-butane (HC-600a), n-propane etc.) | kt HFC                | -99.79%            | 0                                         | 0          | -2                      | 0                  | 0                                      |
|                                                                          | Alternative propellant (i. e. HFC-152a)                                                           |                       | -91.33%            | 0                                         | 0          | -1                      | 0                  | 0                                      |
|                                                                          | Alternative propellant (e. g. HFO-1234ze)                                                         |                       | -99.58%            | 0                                         | 0          | 9.29                    | 0                  | 0                                      |
| Commercial air conditioning, emissions banked in equipment               | Good practice: leakage control, improved components                                               | kt HFC                | -30%               | 10                                        | 0          | 1.44                    | 0                  | 0.000088                               |
|                                                                          | Alternative hydrocarbon refrigerant (i. e. propane, iso-butane, propene (HC-1270), etc.)          |                       | -99.85%            | 20                                        | 34.86      | -1.91                   | 0                  | 0                                      |
|                                                                          | Alternative technology: pressurized CO <sub>2</sub>                                               |                       | -99.95%            | 10                                        | 112.78     | 2.97                    | 200                | 0                                      |
|                                                                          | Alternative low-GWP HFC's (e. g. HFC-152a)                                                        |                       | -93.81%            | 10                                        | 138.27     | -0.71                   | 0                  | 0                                      |
| Commercial air conditioning, emissions from scrapped equipment           | Alternative low GWP refrigerant (i. e. HFO-1234yf)                                                |                       | -99.80%            | 10                                        | 169.17     | 2.25                    | 0                  | 0                                      |
|                                                                          | Good practice: end-of-life recollection                                                           | kt HFC                | -88%               | 10                                        | 0          | 33.33                   | 0                  | 0                                      |
|                                                                          | Alternative hydrocarbon refrigerant (i. e. propane, iso-butane, propene, etc.)                    |                       | -99.85%            | 0                                         | 0          | 0                       | 0                  | 0                                      |
|                                                                          | Alternative technology: pressurized CO <sub>2</sub>                                               |                       | -99.95%            | 10                                        | 0          | 0                       | 0                  | 0                                      |
| Commercial refrigeration, emissions banked in equipment                  | Alternative low-GWP HFC's (e. g. HFC-152a)                                                        |                       | -93.81%            | 10                                        | 0          | 16.67                   | 0                  | 0                                      |
|                                                                          | Alternative low GWP refrigerant (i. e. HFO-1234yf)                                                |                       | -99.80%            | 10                                        | 0          | 16.67                   | 0                  | 0                                      |
|                                                                          | Good practice: leakage control, improved components                                               | kt HFC                | -33%               | 10                                        | 0          | 2.75                    | 0                  | 0.000121                               |
|                                                                          | Alternative hydrocarbon refrigerants (i. e. propane, iso-butane, propene, etc.)                   |                       | -99.91%            | 10                                        | 913.51     | -0.89                   | -0.00025           | 0                                      |
| Commercial refrigeration, emissions from scrapped equipment              | Alternative low-GWP HFC's (e. g. HFC-152a)                                                        |                       | -96.13%            | 10                                        | 136.87     | -12.75                  | 0                  | 0                                      |
|                                                                          | Alternative technology: pressurized CO <sub>2</sub>                                               |                       | -99.97%            | 10                                        | 230.98     | -7.47                   | 300                | 0                                      |
|                                                                          | Good practice: end-of-life recollection                                                           | kt HFC                | -80%               | 10                                        | 0          | 1.16                    | 0                  | 0                                      |
|                                                                          | Alternative hydrocarbon refrigerants (i. e. propane, iso-butane, propene, etc.)                   |                       | -99.91%            | 0                                         | 0          | 0                       | 0                  | 0                                      |
| Domestic small hermetic refrigerators, emissions from scrapped equipment | Alternative low-GWP HFC's (e. g. HFC-152a)                                                        |                       | -96.13%            | 10                                        | 136.87     | -12.75                  | 0                  | 0                                      |
|                                                                          | Alternative technology: pressurized CO <sub>2</sub>                                               |                       | -99.97%            | 10                                        | 0          | 0                       | 0                  | 0                                      |
|                                                                          | Good practice: end-of-life recollection                                                           | kt HFC                | -80%               | 15                                        | 0          | 12.5                    | 0                  | 0                                      |
| Fire extinguishers, emissions banked in equipment                        | Alternative hydrocarbon refrigerant (i. e. iso-butane)                                            |                       | -99.79%            | 15                                        | 92.65      | -4.42                   | 0                  | 0                                      |
|                                                                          | Good practice: leakage control, improved components                                               | kt HFC                | -20%               | 20                                        | 0          | 0.53                    | 0                  | 0.000007                               |
| Fire extinguishers, emissions from scrapped equipment                    | Alternative agent: Fluoro-ketone (FK-5-1-12)                                                      |                       | -100%              | 20                                        | 25.88      | 0.37                    | 0                  | 0                                      |
|                                                                          | Good practice: end-of-life recollection                                                           | kt HFC                | -90%               | 20                                        | 0          | 0.8                     | 0                  | 0                                      |
| Ground source heat pumps, emissions banked in equipment                  | Alternative agent: Fluoro-ketone (FK-5-1-12)                                                      |                       | -100%              | 20                                        | 0          | 0.61                    | 0                  | 0                                      |
|                                                                          | Good practice: leakage control, improved components                                               | kt HFC                | -30%               | 15                                        | 0          | 0.36                    | 0                  | 0.000116                               |
|                                                                          | Alternative hydrocarbon refrigerants (i. e. Propane (HC-290), propene (HC-1270), etc.)            |                       | -99.86%            | 15                                        | 134.35     | -0.35                   | 0                  | 0                                      |
|                                                                          | Alternative technology: pressurized CO <sub>2</sub>                                               |                       | -99.95%            | 15                                        | 338.18     | -0.3                    | 50                 | 0                                      |
| Ground source heat pumps, emissions from scrapped equipment              | Alternative low-GWP HFC's (e. g. HFC-152a)                                                        |                       | -94.06%            | 15                                        | 171.41     | 1.31                    | 0                  | 0                                      |
|                                                                          | Good practice: end-of-life recollection                                                           | kt HFC                | -80%               | 15                                        | 0          | 20.8                    | 0                  | 0                                      |
|                                                                          | Alternative hydrocarbon refrigerants (i. e. Propane (HC-290), propene (HC-1270), etc.)            |                       | -99.86%            | 15                                        | 0          | 20.83                   | 0                  | 0                                      |
|                                                                          | Alternative technology: pressurized CO <sub>2</sub>                                               |                       | -99.95%            | 15                                        | 0          | 0                       | 0                  | 0                                      |
| HCFC-22 production for emissive use                                      | Alternative low-GWP HFC's (e. g. HFC-152a)                                                        |                       | -94.06%            | 15                                        | 0          | 20.83                   | 0                  | 0                                      |
|                                                                          | Post combustion of HFC-23                                                                         | kt HFC                | -99.99%            | 10                                        | 16.46      | 2.19                    | 0                  | 0                                      |
| HCFC-22 production for feedstock use                                     | Post combustion of HFC-23                                                                         |                       | -99.99%            | 10                                        | 16.46      | 2.19                    | 0                  | 0                                      |

**Continued Table S6. Mitigation options for HFC emissions considered in the GAINS model**

| Sector description                                                                                    | Technology description                              | Unit of activity data | Removal efficiency | Cost parameters per unit of activity data |            |                         |                    |                                        |
|-------------------------------------------------------------------------------------------------------|-----------------------------------------------------|-----------------------|--------------------|-------------------------------------------|------------|-------------------------|--------------------|----------------------------------------|
|                                                                                                       |                                                     |                       |                    | Lifetime of equipment                     | Investment | Operation & maintenance | Electricity demand | Labour time                            |
|                                                                                                       |                                                     |                       |                    | years                                     | million €  | million €/year          | GWh                | fraction of annual work hrs (1800 hrs) |
| Industrial refrigeration (including food and agricultural sectors), emissions banked in equipment     | Good practice: leakage control, improved components | kt HFC                | -42%               | 15                                        | 0          | 1.43                    | 0                  | 0.000008                               |
|                                                                                                       | Alternative refrigerant: Propane (HC-290)           |                       | -99.88%            | 10                                        | 913.51     | -0.89                   | -0.00025           | 0                                      |
|                                                                                                       | Alternative low-GWP HFC's (e. g. HFC-152a)          |                       | -95.01%            | 15                                        | 136.87     | -12.75                  | 0                  | 0                                      |
|                                                                                                       | Alternative refrigerant: ammonia (NH <sub>3</sub> ) |                       | -100%              | 15                                        | 468.09     | -48.05                  | -337.5             | 0                                      |
| Industrial refrigeration (including food and agricultural sectors), emissions from scrapped equipment | Alternative technology: pressurized CO <sub>2</sub> |                       | -99.96%            | 15                                        | 133.64     | -5.88                   | 69                 | 0                                      |
|                                                                                                       | Good practice: end-of-life recollection             | kt HFC                | -88%               | 15                                        | 0          | 0.18                    | 0                  | 0                                      |
|                                                                                                       | Alternative refrigerant: Propane (HC-290)           |                       | -99.88%            | 0                                         | 0          | 0                       | 0                  | 0                                      |
|                                                                                                       | Alternative low-GWP HFC's (e. g. HFC-152a)          |                       | -95.01%            | 15                                        | 136.87     | -12.75                  | 0                  | 0                                      |
| Mobile air-conditioner in buses, emissions banked in equipment                                        | Alternative refrigerant: ammonia (NH <sub>3</sub> ) |                       | -100%              | 15                                        | 468.09     | 0                       | 0                  | 0                                      |
|                                                                                                       | Alternative technology: pressurized CO <sub>2</sub> |                       | -99.96%            | 15                                        | 0          | 0                       | 0                  | 0                                      |
|                                                                                                       | Good practice: leakage control, improved components | kt HFC                | -50%               | 12                                        | 0          | 1                       | 0                  | 0                                      |
|                                                                                                       | Alternative refrigerant: HFO-1234yf                 |                       | -99.72%            | 12                                        | 68.63      | 6.73                    | 0                  | 0                                      |
| Mobile air-conditioner in buses, emissions from scrapped equipment                                    | Alternative technology: pressurized CO <sub>2</sub> |                       | -99.93%            | 12                                        | 193.41     | 3.17                    | 0                  | 0                                      |
|                                                                                                       | Good practice: end-of-life recollection             | kt HFC                | -80%               | 12                                        | 0          | 0                       | 0                  | 0.0000042                              |
|                                                                                                       | Alternative refrigerant: HFO-1234yf                 |                       | -99.72%            | 12                                        | 17.36      | 0                       | 0                  | 0                                      |
| Mobile air-conditioner in heavy duty trucks, emissions banked in equipment                            | Alternative technology: pressurized CO <sub>2</sub> |                       | -99.93%            | 12                                        | 0          | 0                       | 0                  | 0                                      |
|                                                                                                       | Good practice: end-of-life recollection             | kt HFC                | -50%               | 12                                        | 0          | 0.5                     | 0                  | 0                                      |
|                                                                                                       | Alternative refrigerant: HFO-1234yf                 |                       | -99.72%            | 12                                        | 48.67      | 5                       | 0                  | 0                                      |
| Mobile air-conditioner in heavy duty trucks, emissions from scrapped equipment                        | Alternative technology: pressurized CO <sub>2</sub> |                       | -99.93%            | 12                                        | 56.78      | -2                      | 0                  | 0                                      |
|                                                                                                       | Good practice: end-of-life recollection             | kt HFC                | -80%               | 12                                        | 0          | 0                       | 0                  | 0.0000187                              |
|                                                                                                       | Alternative refrigerant: HFO-1234yf                 |                       | -99.72%            | 12                                        | 17.36      | 0                       | 0                  | 0                                      |
| Mobile air-conditioner in cars, emissions banked in equipment                                         | Alternative technology: pressurized CO <sub>2</sub> |                       | -99.93%            | 12                                        | 0          | 0                       | 0                  | 0                                      |
|                                                                                                       | Good practice: leakage control, improved components | kt HFC                | -50%               | 12                                        | 0          | 0.5                     | 0                  | 0                                      |
|                                                                                                       | Alternative refrigerant: HFO-1234yf                 |                       | -99.72%            | 12                                        | 48.67      | 6.92                    | 0                  | 0                                      |
| Mobile air-conditioner in cars, emissions from scrapped equipment                                     | Alternative technology: pressurized CO <sub>2</sub> |                       | -99.93%            | 12                                        | 170        | -0.08                   | 0                  | 0                                      |
|                                                                                                       | Good practice: end-of-life recollection             | kt HFC                | -80%               | 12                                        | 0          | 0                       | 0                  | 0.0000373                              |
|                                                                                                       | Alternative refrigerant: HFO-1234yf                 |                       | -99.72%            | 12                                        | 17.36      | 0                       | 0                  | 0                                      |
| Mobile air-conditioner in light duty trucks, emissions banked in equipment                            | Alternative technology: pressurized CO <sub>2</sub> |                       | -99.93%            | 12                                        | 0          | 0                       | 0                  | 0                                      |
|                                                                                                       | Good practice: leakage control, improved components | kt HFC                | -50%               | 12                                        | 0          | 0.5                     | 0                  | 0                                      |
|                                                                                                       | Alternative refrigerant: HFO-1234yf                 |                       | -99.72%            | 12                                        | 48.67      | 5                       | 0                  | 0                                      |
| Mobile air-conditioner in light duty trucks, emissions from scrapped equipment                        | Alternative technology: pressurized CO <sub>2</sub> |                       | -99.93%            | 12                                        | 56.78      | -2                      | 0                  | 0                                      |
|                                                                                                       | Good practice: end-of-life recollection             | kt HFC                | -80%               | 12                                        | 0          | 0                       | 0                  | 0.0000373                              |
|                                                                                                       | Alternative refrigerant: HFO-1234yf                 |                       | -99.72%            | 12                                        | 17.36      | 0                       | 0                  | 0                                      |
| Mobile air-conditioner in light duty trucks, emissions from scrapped equipment                        | Alternative technology: pressurized CO <sub>2</sub> |                       | -99.93%            | 12                                        | 0          | 0                       | 0                  | 0                                      |

**Continued Table S6. Mitigation options for HFC emissions considered in the GAINS model**

| Sector description                                              | Technology description                                                                                      | Unit of activity data | Removal efficiency | Cost parameters per unit of activity data |            |                         |                    |                                        |
|-----------------------------------------------------------------|-------------------------------------------------------------------------------------------------------------|-----------------------|--------------------|-------------------------------------------|------------|-------------------------|--------------------|----------------------------------------|
|                                                                 |                                                                                                             |                       |                    | Lifetime of equipment                     | Investment | Operation & maintenance | Electricity demand | Labour time                            |
|                                                                 |                                                                                                             |                       |                    | years                                     | million €  | million €/year          | GWh                | fraction of annual work hrs (1800 hrs) |
| One component foams                                             | Alternative hydrocarbon blowing agents (i. e. Iso-butane (HC-600a), Iso-pentane, n-pentane, etc.)           | kt HFC                | -99.74%            | 15                                        | 1.74       | 0                       | 0                  | 0                                      |
|                                                                 | Alternative technology: pressurized CO <sub>2</sub>                                                         |                       | -99.91%            | 15                                        | 6.96       | -1                      | 0                  | 0                                      |
|                                                                 | Alternative blowing agent: HFO-1234ze                                                                       |                       | -99.47%            | 15                                        | 3.48       | 7                       | 0                  | 0                                      |
|                                                                 | Alternative low-GWP HFC's (e. g. HFC-152a)                                                                  |                       | -89.13%            | 15                                        | 1.74       | -3                      | 0                  | 0                                      |
| Other foams                                                     | Alternative hydrocarbon blowing agents (i. e. Iso-butane (HC-600a), Iso-pentane, n-pentane, etc.)           | kt HFC                | -99.74%            | 15                                        | 1.74       | 0                       | 0                  | 0                                      |
|                                                                 | Alternative technology: pressurized CO <sub>2</sub>                                                         |                       | -99.91%            | 15                                        | 6.96       | -1                      | 0                  | 0                                      |
|                                                                 | Alternative blowing agent: HFO-1234ze                                                                       |                       | -99.47%            | 15                                        | 3.48       | 7                       | 0                  | 0                                      |
|                                                                 | Alternative low-GWP HFC's (e. g. HFC-152a)                                                                  |                       | -89.13%            | 15                                        | 1.74       | -3                      | 0                  | 0                                      |
| Other HFC use                                                   | Alternative low-GWP HFC's (e. g. HFC-152a)                                                                  | kt HFC                | -91.33%            | 0                                         | 0          | 2                       | 0                  | 0                                      |
| Refrigerated transport, emissions banked in equipment           | Good practice: leakage control, improved components                                                         | kt HFC                | -20%               | 15                                        | 0          | 2.5                     | 0                  | 0.000427                               |
|                                                                 | Alternative hydrocarbon refrigerant: Propane (HC-290), propene (HC-1270)                                    |                       | -93.45%            | 15                                        | 136.87     | -12.75                  | 0                  | 0                                      |
|                                                                 | Alternative technology: pressurized CO <sub>2</sub>                                                         |                       | -99.95%            | 15                                        | 403.68     | -41.88                  | 0                  | 0                                      |
|                                                                 | Alternative low-GWP HFC's (e. g. HFC-152a)                                                                  |                       | -93.45%            | 15                                        | 136.87     | -12.75                  | 0                  | 0                                      |
| Refrigerated transport, emissions from scrapped equipment       | Good practice: end-of-life recollection                                                                     | kt HFC                | -80%               | 15                                        | 0          | 0                       | 0                  | 0.000427                               |
|                                                                 | Alternative hydrocarbon refrigerant: Propane (HC-290), propene (HC-1270)                                    |                       | -99.84%            | 0                                         | 0          | 0                       | 0                  | 0                                      |
|                                                                 | Alternative technology: pressurized CO <sub>2</sub>                                                         |                       | -99.95%            | 15                                        | 0          | 0                       | 0                  | 0                                      |
|                                                                 | Alternative low-GWP HFC's (e. g. HFC-152a)                                                                  |                       | -93.45%            | 15                                        | 136.87     | -12.75                  | 0                  | 0                                      |
| Residential air conditioning, emissions banked in equipment     | Good practice: leakage control, improved components                                                         | kt HFC                | -30%               | 10                                        | 0          | 1.44                    | 0                  | 0.000088                               |
|                                                                 | Alternative hydrocarbon refrigerant (i. e. propane (HC-290), iso-butane (HC-600a), propene (HC-1270), etc.) |                       | -99.85%            | 10                                        | -7.46      | -1.49                   | -0.00037           | 0                                      |
|                                                                 | Alternative technology: pressurized CO <sub>2</sub>                                                         |                       | -99.95%            | 10                                        | 116.8      | 0.78                    | 200                | 0                                      |
|                                                                 | Alternative low-GWP HFC's (e. g. HFC-152a)                                                                  |                       | -93.81%            | 10                                        | -20.01     | -0.6                    | 0                  | 0                                      |
| Residential air conditioning, emissions from scrapped equipment | Alternative low GWP refrigerant (i. e. HFO-1234yf)                                                          |                       | -99.80%            | 10                                        | 87.60      | 2.27                    | 0                  | 0                                      |
|                                                                 | Good practice: end-of-life recollection                                                                     | kt HFC                | -88%               | 10                                        | 0          | 33.33                   | 0                  | 0                                      |
|                                                                 | Alternative hydrocarbon refrigerant (i. e. propane (HC-290), iso-butane (HC-600a), propene (HC-1270), etc.) |                       | -99.85%            | 0                                         | 0          | 0                       | 0                  | 0                                      |
|                                                                 | Alternative technology: pressurized CO <sub>2</sub>                                                         |                       | -99.95%            | 10                                        | 0          | 0                       | 0                  | 0                                      |
| Solvents                                                        | Alternative low-GWP HFC's (e. g. HFC-152a)                                                                  |                       | -93.81%            | 10                                        | 0          | 33.33                   | 0                  | 0                                      |
|                                                                 | Alternative low GWP refrigerant (i. e. HFO-1234yf)                                                          |                       | -99.80%            | 10                                        | 0          | 33.33                   | 0                  | 0                                      |
|                                                                 | Ban of use                                                                                                  | kt HFC                | -100%              | 0                                         | 0          | 1                       | 0                  | 0                                      |

Source: (IPCC/TEAP, 2005; Tohka, 2005; Schwartz et al., 2011; Höglund-Isaksson et al., 2012; Höglund-Isaksson et al., 2013; USEPA, 2013; Purohit et al, 2016)

**Table S7. Mitigation options for PFC and SF<sub>6</sub> emissions considered in the global version of the GAINS model**

| Sector description                                                  | Technology description                                                    | Unit of activity data | Removal efficiency | Cost parameters per unit of activity data |                         |                                           |                           |                                   |
|---------------------------------------------------------------------|---------------------------------------------------------------------------|-----------------------|--------------------|-------------------------------------------|-------------------------|-------------------------------------------|---------------------------|-----------------------------------|
|                                                                     |                                                                           |                       |                    | Lifetime of equipment<br>years            | Investment<br>million € | Operation & maintenance<br>million €/year | Electricity demand<br>GWh | Labour time<br>fraction of annual |
| <b>A. PFC Emissions</b>                                             |                                                                           |                       |                    |                                           |                         |                                           |                           |                                   |
| Primary Al production with Centre worked prebake (CWPB) technology  | CWPB to PFPB conversion                                                   | Mt primary Al         | -85%               | 20                                        | 150                     | -2.13                                     | -1700                     | 0                                 |
|                                                                     | CWPB to NEW* conversion                                                   |                       | -100%              | 20                                        | 3045                    | 0                                         | 0                         | 0                                 |
|                                                                     | CWPB retrofitting                                                         |                       | -26%               | 20                                        | 40                      | 0                                         | 0                         | 0                                 |
| Primary Al production with point feeder prebake (PFPB) technology   | PFPB to NEW conversion                                                    | Mt primary Al         | -100%              | 20                                        | 3150                    | 0                                         | 0                         | 0                                 |
| Primary Al production with side worked prebake (SWPB) technology    | SWPB to PFPB conversion                                                   | Mt primary Al         | -97%               | 20                                        | 700                     | -9.94                                     | -800                      | 0                                 |
|                                                                     | SWPB to NEW conversion                                                    |                       | -100%              | 20                                        | 2660                    | 0                                         | 0                         | 0                                 |
|                                                                     | SWPB retrofitting                                                         |                       | -26%               | 20                                        | 77.78                   | 0                                         | 0                         | 0                                 |
| Primary Al production with vertical stud Söderberg (VSS) technology | VSS to PFPB conversion                                                    | Mt primary Al         | -92%               | 20                                        | 3250                    | -46.15                                    | -2300                     | 0                                 |
|                                                                     | VSS to NEW conversion                                                     |                       | -100%              | 20                                        | 875                     | 0                                         | 0                         | 0                                 |
|                                                                     | VSS retrofitting                                                          |                       | -28.19%            | 20                                        | 175                     | -7                                        | 0                         | 0                                 |
| Semiconductor manufacture                                           | Alternative solvent: use of NF <sub>3</sub>                               | kt PFC                | -99%               | 0                                         | 0                       | 183.54                                    | 0                         | 0                                 |
| <b>B. SF<sub>6</sub> Emissions</b>                                  |                                                                           |                       |                    |                                           |                         |                                           |                           |                                   |
| SF <sub>6</sub> consumption in high and mid voltage switches        | Good practice: leakage control and end-of-life recollection and recycling | kt SF <sub>6</sub>    | -84%               | 0                                         | 0                       | 86.04                                     | 0                         | 0                                 |
| Magnesium production and magnesium casting                          | Alternative protection gas: SF <sub>6</sub> replaced by SO <sub>2</sub>   | t Mg processed        | -100%              | 1                                         | 9.12                    | 0.0456                                    | 0                         | 0                                 |
| Soundproof windows                                                  | Ban of use                                                                | kt SF <sub>6</sub>    | -100%              | 0                                         | 0                       | 2.62                                      | 0                         | 0                                 |
| Other SF <sub>6</sub> emission sources                              | Ban of use                                                                | kt SF <sub>6</sub>    | -100%              | 0                                         | 0                       | 2.62                                      | 0                         | 0                                 |

\*NEW refer to Wetted drained cathodes, Inert anodes, Carbothermic reduction and Kaolinite reduction as mentioned in IEA's Energy Technology Perspective 2010 (IEA/OECD, 2010)

**Table S8. Regional aggregations of F-gas emission estimates in GAINS**

| <b>World region</b>     | <b>GAINS F-gas regions</b>                                                                                                                                                                                                                                                                                                                                                                                                                                                                                                                                                                                                                                                                                                                                |
|-------------------------|-----------------------------------------------------------------------------------------------------------------------------------------------------------------------------------------------------------------------------------------------------------------------------------------------------------------------------------------------------------------------------------------------------------------------------------------------------------------------------------------------------------------------------------------------------------------------------------------------------------------------------------------------------------------------------------------------------------------------------------------------------------|
| Africa                  | Egypt, South Africa, North Africa (includes Algeria, Morocco, Libya, Tunisia, Sudan), and Other Africa (includes all other African countries)                                                                                                                                                                                                                                                                                                                                                                                                                                                                                                                                                                                                             |
| Australia & New Zealand | Australia and New Zealand                                                                                                                                                                                                                                                                                                                                                                                                                                                                                                                                                                                                                                                                                                                                 |
| China                   | Anhui, Beijing, Chongqing, Fujian, Gansu, Guangdong, Guangxi, Guizhou, Hainan, Hebei, Heilongjiang, Henan, Hong Kong & Macau, Hubei, Hunan, Jilin, Jiangsu, Jiangxi, Liaoning, Inner Mongolia, Ningxia, Qinghai, Shaanxi, Shanghai, Shandong, Shanxi, Sichuan, Tianjin, Tibet (Xizang), Xinjiang, Yunnan, Zhejiang                                                                                                                                                                                                                                                                                                                                                                                                                                        |
| India                   | Andhra Pradesh, Assam, West Bengal, Bihar, Chhattisgarh, Delhi, North East-(excl. Assam), Goa, Gujarat, Haryana, Himachal Pradesh, Jharkhand, Karnataka, Kerala, Maharashtra, Madhya Pradesh, Orissa, Punjab, Rajasthan, Tamil Nadu, Uttaranchal, Uttar Pradesh, Jammu and Kashmir                                                                                                                                                                                                                                                                                                                                                                                                                                                                        |
| Asia rest               | Afghanistan, Armenia, Azerbaijan, Bangladesh (two regions), Bhutan, Brunei, Cambodia, Former Soviet Union States (includes Tajikistan, Turkmenistan and Uzbekistan), Georgia, Indonesia (4 regions), Japan (Chugoku-Shikoku, Chubu, Hokkaido-Tohoku, Kanto, Kinki, Kyushu-Okinawa), Kazakhstan, Kirgizstan, Nepal, North Korea, Laos, Malaysia (Kuala Lumpur, Peninsular Malaysia, Sarawak-Sabah), Mongolia, Myanmar, Pakistan (Karachi, North-West Frontier Provinces and Baluchistan, Punjab, Sind), Philippines (Bicol-Visayas-Mindanao, Luzon, Metro Manila), Singapore, South Korea (North, Pusan, Seoul-Inchon, South), Sri Lanka, Taiwan, Thailand (Bangkok Metropolitan Region, Central Valley, N Highlands, NE Plateau, S Peninsula) and Vietnam |
| EU-28                   | Austria, Belgium, Bulgaria, Croatia, Cyprus, Czech Republic, Denmark, Estonia, Finland, France, Germany, Greece, Hungary, Ireland, Italy, Latvia, Lithuania, Luxembourg, Malta, Netherlands, Poland, Portugal, Romania, Slovakia, Slovenia, Spain, Sweden, United Kingdom                                                                                                                                                                                                                                                                                                                                                                                                                                                                                 |
| Middle East             | Bahrain, Iran, Iraq, Israel, Jordan, Kuwait, Lebanon, Oman, Palestine, Qatar, Saudi Arabia, Syria, United Arab Emirates, Yemen                                                                                                                                                                                                                                                                                                                                                                                                                                                                                                                                                                                                                            |
| Latin America           | Argentine, Brazil, Chile, Mexico, Other Latin America                                                                                                                                                                                                                                                                                                                                                                                                                                                                                                                                                                                                                                                                                                     |
| Europe rest             | Albania, Belarus, Iceland, Moldova, Norway, Switzerland, Turkey, Ukraine                                                                                                                                                                                                                                                                                                                                                                                                                                                                                                                                                                                                                                                                                  |
| Russia                  | Asian and European parts                                                                                                                                                                                                                                                                                                                                                                                                                                                                                                                                                                                                                                                                                                                                  |
| US & Canada             | United States, Canada                                                                                                                                                                                                                                                                                                                                                                                                                                                                                                                                                                                                                                                                                                                                     |



**Table S9. F-gas regulations currently implemented in the baseline scenario**

| Regulation/ agreement                             | Region scope | Gas                         | Emission source                                                    | Content that concerns F-gas emissions                                                                                                                                                                                | Date entering into force |
|---------------------------------------------------|--------------|-----------------------------|--------------------------------------------------------------------|----------------------------------------------------------------------------------------------------------------------------------------------------------------------------------------------------------------------|--------------------------|
| EU F-gas directive (EC 842/2006)                  | EU-wide      | HFCs                        | Refrigeration and air-conditioning                                 | Good practice options with leakage control of equipment in use and end-of-life recollection of scrapped equipment.                                                                                                   | 4 July 2007              |
|                                                   |              |                             | Aerosols                                                           | F-gas use prohibited in aerosol generators intended for entertainment and decorative purposes.                                                                                                                       | 4 July 2009              |
|                                                   |              |                             | One component foams                                                | F-gas use prohibited unless required to meet national safety standards                                                                                                                                               | 4 July 2008              |
|                                                   |              | SF <sub>6</sub>             | Magnesium casting                                                  | SF <sub>6</sub> use prohibited                                                                                                                                                                                       | 1 Jan 2008               |
|                                                   |              |                             | Windows                                                            | SF <sub>6</sub> use prohibited                                                                                                                                                                                       | 4 July 2007              |
|                                                   |              |                             | Other SF <sub>6</sub> sources, e.g., tires, sports equipment, etc. | SF <sub>6</sub> use prohibited                                                                                                                                                                                       | 4 July 2007              |
| EU MAC Directive (EC 40/2006)                     | EU-wide      | HFCs                        | Mobile air conditioners                                            | Replacing the use of high GWP HFCs with cooling agents GWP <sub>100</sub> < 150 in all new vehicle models placed on the market.                                                                                      | 1 Jan 2011               |
| EU Directive on end-of-life vehicles (EC 53/2000) | EU-wide      | HFCs                        | Scrapped mobile air conditioners                                   | Recollection and proper handling of scrapped mobile air conditioners                                                                                                                                                 | 18 Sep 2000              |
| EU ETS Directive (EC/29/2009)                     | EU-wide      | PFCs                        | Primary Al production                                              | Industry needs to acquire tradable emission permits under the EU emission trading system                                                                                                                             | 1 Jan 2012               |
| EU Effort Sharing Decision (EC/406/2009)          | EU-wide      | All GHGs                    | All non-ETS sectors                                                | Decision defines legally binding national GHG emission targets for non-ETS sectors. Target year is 2020, but countries need to comply with a linear emission path between 2013 and 2020.                             | 2013                     |
| F-gas regulation (Regulation 517/2014)            | EU-wide      | HFCs, PFCs, SF <sub>6</sub> | All F-gas                                                          | Limits the total amount of the most important F-gases that producers and importers are entitled to place on the market in the EU from 2015 onwards and phases them down in steps to one fifth of 2014 sales by 2030. | 1 Jan 2015               |
| National F-gas regulations                        | Austria      | HFCs, PFCs, SF <sub>6</sub> | All F-gas sectors                                                  | "HFKW-FKW-SF6-Verordnung" is more stringent than EU F-gas regulation in the control of emissions from foams.                                                                                                         | 2002                     |
|                                                   | Belgium      | HFCs                        | Commercial and industrial refrigeration                            | End-of-life recovery initiated already 2005                                                                                                                                                                          | 2005                     |
|                                                   | Denmark      | HFCs, PFCs, SF <sub>6</sub> | All F-gas sectors                                                  | Deposit-refund scheme (1992), tax on F-gases on producers and importers (2001), ban on import, sale and use of new products containing F-gases with specific exemptions (2002).                                      | 1992                     |
|                                                   | Germany      | HFCs, PFCs, SF <sub>6</sub> | All F-gas sectors                                                  | In contrast to the EU F-gas regulation the "Chemikalien-Klimaschutzverordnung" specify maximum leakage rates and include the refrigerated transport sector.                                                          | 2008                     |
|                                                   | Netherlands  | HFCs                        | Air conditioners and refrigeration                                 | Mandatory good practice with leakage control and end-of-life recovery.                                                                                                                                               | 1997                     |

|                                                                                                                                           |                      |                             |                                                      |                                                                                                                                                                                                                                                 |                  |
|-------------------------------------------------------------------------------------------------------------------------------------------|----------------------|-----------------------------|------------------------------------------------------|-------------------------------------------------------------------------------------------------------------------------------------------------------------------------------------------------------------------------------------------------|------------------|
|                                                                                                                                           | Sweden               | HFCs, PFCs, SF <sub>6</sub> | All F-gas sectors                                    | Environmental fees regulation also targeting F-gases (1998) and specific F-gas regulation (2007)                                                                                                                                                | 1998             |
| Voluntary agreement                                                                                                                       | Global               | PFCs                        | Semiconductor industry                               | All semiconductor producers should by 2010 reduce PFC emissions to a level 10 percent of 1995 emissions.                                                                                                                                        | Starting in 2001 |
| Voluntary Aluminum Industrial Partnership (VAIP)                                                                                          | United States        | PFCs                        | Primary Aluminum production                          | To improve aluminum production efficiency while reducing perfluorocarbon (PFC) emissions                                                                                                                                                        | 1995             |
| Significant New Alternatives Policy (SNAP)                                                                                                | United States        | HFCs, PFCs, SF <sub>6</sub> | All F-gas sectors                                    | Under Section 612 of the Clean Air Act (CAA), EPA's Significant New Alternatives Policy (SNAP) program reviews substitutes within a comparative risk framework.                                                                                 | 1990             |
| EPA's Air Conditioning Improvement Credits                                                                                                | United States        | HFC                         | Mobile air-conditioning                              | Incentive to accelerate the use of low-GWP refrigerants                                                                                                                                                                                         | 2015             |
| Protection of Stratospheric Ozone: Change of Listing Status for Certain Substitutes under the Significant New Alternatives Policy Program | United States        | HFCs                        | All sectors                                          | Limit the use of high-GWP HFCs                                                                                                                                                                                                                  | 2015             |
| Act on the Rational Use and Proper Management of Fluorocarbons (Act no. 64 of 2001)                                                       | Japan                | HFCs, PFCs, SF <sub>6</sub> | All F-gas sectors                                    | Necessary measures to reduce emission of HFCs, Comprehensive measures for reducing high GWP HFCs in newly revised law, Labelling and voluntary plan                                                                                             | 2015             |
| Swiss F-gas regulations                                                                                                                   | Switzerland          | HFCs, PFCs, SF <sub>6</sub> | All F-gas sectors                                    | HFCs are banned in AC systems with a cooling capacity of more than 600 kW. Bans (with some exemptions) on HFC based solvents, foams, refrigerants, fire extinguishing agents, and spray cans containing HFCs.                                   | 2013             |
| HFC levy                                                                                                                                  | Australia            | HFCs                        | Refrigeration, air-conditioning, foam, aerosol, etc. | A carbon equivalent price is imposed on import and manufacture of HFC refrigerants that are ozone safe but are powerful greenhouse gases.                                                                                                       | 2012             |
| Clean Development Mechanism of the Kyoto Protocol                                                                                         | Developing countries | HFCs, PFCs, SF <sub>6</sub> | All F-gas sectors                                    | Control of HFC-23 emissions from HCFC-22 production through post-combustion, avoidance of HFC emissions in rigid Poly Urethane Foam (PUF) manufacturing, PFC reduction in primary Al production, SF <sub>6</sub> recovery and reclamation, etc. | 1997             |
| Montreal Protocol: Accelerated phase-out of ODS                                                                                           | Global               | HCFCs                       | Refrigeration, air-conditioning, foam, etc.          | Phase-out of HCFC's in Article 5 and non-Article 5 countries                                                                                                                                                                                    | 2007             |

**Table S10. Uncertainty in emissions for major F-gas sectors in GAINS**

| Sector                      | Emission factors          | Emission factor used in the GAINS model* |            | Emissions in 2050<br>(MtCO <sub>2eq.</sub> ) | Uncertainty range |
|-----------------------------|---------------------------|------------------------------------------|------------|----------------------------------------------|-------------------|
|                             |                           | Uncontrolled*                            | Controlled |                                              |                   |
| Aerosol                     | 50-100% <sup>a-f</sup>    | 75%                                      | 75%        | 25.1                                         | ±33%              |
| Stationary air-conditioning | 1-13% <sup>a,b,f</sup>    | 10%                                      | 7%         | 1111.4                                       | (-)54% to (+)2%   |
| Commercial refrigeration    | 10-35% <sup>a,b,f,g</sup> | 18-22%                                   | 12-15%     | 590.8                                        | (-)38% to (+)59%  |
| HCFC-22 production          | 1.5-4% <sup>a,b,e,h</sup> | 3%                                       | 0.01%      | 389.1                                        | (-)49% to (+)36%  |
| Industrial refrigeration    | 7-25% <sup>a-g</sup>      | 11-13.7%                                 | 6.5-8%     | 163.7                                        | (-)28% to (+)64%  |
| Mobile air-conditioning     | 7-24% <sup>e-j</sup>      | 18-24%                                   | 9-12%      | 410.3                                        | (-)18% to (+)82%  |
| Refrigerated Transport      | 15-50% <sup>a-h</sup>     | 25-30%                                   | 20-24%     | 144.6                                        | (-)37 to (+)66%   |

\* Lower values for non-Article 5 and higher values for Article 5 countries.

Source: (IPCC, 2000<sup>a</sup>; USEPA, 2004<sup>b</sup>; IPCC, 2006<sup>c</sup>; UNFCCC, 2012<sup>d</sup>; IPCC/TEAP, 2005<sup>e</sup>; Tohka, 2005<sup>f</sup>; Gschrey et al., 2011<sup>g</sup>; Schwartz et al., 2011<sup>h</sup>; McCulloch and Lindley, 2007<sup>i</sup>; Koronaki et al., 2012<sup>j</sup>)

## References

- Adnot, J., Riviere, P., Marchio, D., Becirspahic, S., Lopes, C., Blanco, I., Perez-Lombard, L., Ortiz, J., Papakonstantinou, N., Doukas, P., Joppolo, C.M., Casale, C., Benke, G., Giraud, D., Houdant, N., Colomines, F., Gavriiliuc, R., Popescu, R., Burchiu, S., Georges, B. and Hitchin, R.: Energy Efficiency and Certification of Central Air Conditioners (EECCAC): Study for the DG Transportation-Energy (DGTREN) of the Commission of the EU, ARMINES, Paris, France, 2003.
- Akasaka, R., Tanaka, K. and Higashi, Y.: Thermodynamic property modeling for 2,3,3,3-tetrafluoropene (R-1234yf), *International Journal of Refrigeration*, 33 (1), 52–60, [doi:10.1016/j.ijrefrig.2009.09.004](https://doi.org/10.1016/j.ijrefrig.2009.09.004), 2010.
- Amann, M., Kejun, J., Jiming, H., Wang, S., Wei, W., Jia, X., Chuying, Z., Bertok, I., Borken, J., Cofala, J., Heyes, C., Høglund, L., Klimont, Z., Purohit, P., Rafaj, P., Schöpp, W., Toth, G., Wagner, F. and Winiwarter, W.: GAINS-Asia. Scenarios for cost-effective control of air pollution and greenhouse gases in China, International Institute for Applied Systems Analysis (IIASA), Laxenburg, Austria, 2008.
- Bartos, S.C., Kshetry, N. and Burton, C.S.: Modeling China's semiconductor industry fluorinated compound emissions and drafting a roadmap for climate protection. *International Journal of Greenhouse Gas Control*, 2 (4), 665–676, [doi:10.1016/j.ijggc.2008.02.010](https://doi.org/10.1016/j.ijggc.2008.02.010), 2008.
- Baumert, K. and Selman, M., 2003. Heating and Cooling Degree Days. World Resources Institute (WRI), Washington, D.C.
- Bayer, P., Saner, D., Bolay, S., Rybach, L. and Blum, P. 2012. Greenhouse gas emission savings of ground source heat pump systems in Europe: A review. *Renewable and Sustainable Energy Reviews*, 16 (2), pp. 1256-1267.
- B-COOL: Low cost and high efficiency CO<sub>2</sub> mobile air conditioning system for lower segment cars. Final Report (TST4-CT-2005-012394). Project funded by the EU Sixth Framework Program, 2011. URL [http://cordis.europa.eu/search/index.cfm?fuseaction=lib.document&DOC\\_LANG\\_ID=EN&DOC\\_ID=121600961&q](http://cordis.europa.eu/search/index.cfm?fuseaction=lib.document&DOC_LANG_ID=EN&DOC_ID=121600961&q).
- Blum, P., Campillo, G., Münch, W. and Kölbl, T. CO<sub>2</sub> savings of ground source heat pump systems – A regional analysis, *Renewable Energy*, 35 (1), 122-127, [doi:10.1016/j.renene.2009.03.034](https://doi.org/10.1016/j.renene.2009.03.034), 2010.
- Capros, P., de Vita, A., Tasios, N., Papadopoulos, D., Siskos, P., Apostolaki, E., Zampara, M., Paroussos, L., Fragiadakis, K., Kouvaritakis, N., Høglund-Isaksson, L., Winiwarter, W., Purohit, P., Bottcher, H., Frank, S., Havlík, P., Gusti, M. and Witzke, H.P. EU Energy, Transport and GHG emissions trends to 2050 — Reference Scenario 2013. European Commission-Directorate-General for Energy, Directorate-General for Climate Action, and Directorate-General for Mobility and Transport, Publications Office of the European Union, Luxembourg, 2013.
- CEPA: Documentation of California's Greenhouse Gas Inventory (3rd Edition), California Environmental Protection Agency (CEPA) California Air Resources Board, Sacramento, CA, 2010.
- Chaturvedi, V., Sharma, M., Chattopadhyay, S. and Purohit, P.: India's Long Term Hydrofluorocarbon Emissions: A detailed cross sectoral analysis within an integrated assessment modelling framework. CEEW-IIASA Report, May 2015 (See: <http://ceew.in/pdf/ceew-indias-long-term-hydrofluorocarbon-emissions-29-may-15.pdf>).

- Cofala, J., Purohit, P., Rafaj, P. and Klimont, Z.: GHG mitigation potentials and costs from energy use and industrial sources in Annex-I countries: Methodology. International Institute for Applied Systems Analysis (IIASA), Laxenburg, Austria, 2009.
- CSI: Background technical study on ozone-depleting substances and halocarbons used as refrigerants, Final Report submitted to Environment Canada (EC) by Cheminfo Services Inc. (CSI), Ontario, 2009.
- Daikin: HFC-32 - Next generation refrigerant that helps reduce global warming. Daikin Europe N.V., Brussels, URL [www.daikin.eu/binaries/WS\\_Daikin\\_Factsheet\\_ver2.1\\_tcm507-401295.pdf](http://www.daikin.eu/binaries/WS_Daikin_Factsheet_ver2.1_tcm507-401295.pdf) accessed on 8th August 2016.
- DeAngelo, B., Beach, R.H., Rose, S., Salas, W., Li, C. and DelGrosso, S.: International agriculture: estimates of non-CO<sub>2</sub> and soil carbon marginal mitigation costs (No. EPA Report 430-R-06-005), U. S. Environmental Protection Agency, Office of Atmospheric Programs, Washington, DC, 2006.
- Defra: HFC consumption and emissions forecasting: containing an update to the June 2008 HFC projections, Report to the Department for Environment Food and Rural Affairs (Defra) by AEA group, September 2010. URL: <http://archive.defra.gov.uk/environment/quality/air/fgas/documents/fgas-hfc-forecasting.pdf>.
- EHPA: European Heat Pump Action Plan. European Heat Pump Association (EHPA), Brussels, 2008. URL <http://www.ehpa.org/>.
- EHPA: European Heat Pump Statistics: Outlook 2010, European Heat Pump Association (EHPA), Brussels, 2010. URL <http://www.ehpa.org/>
- EPC/DG ECFIN: The 2012 Ageing Report: Economic and budgetary projections for the EU27 Member States (2010-2060). Joint Report prepared by the European Commission (DG ECFIN) and the Economic Policy Committee (AWG), European Economy 2/2012. European Union, Brussels, doi: 10.2765/19991, 2012. URL [http://ec.europa.eu/economy\\_finance/publications/european\\_economy/2012/pdf/ee-2012-2\\_en.pdf](http://ec.europa.eu/economy_finance/publications/european_economy/2012/pdf/ee-2012-2_en.pdf)
- EUROSTAT: Directorate-General of the European Commission, Luxembourg, 2010. URL <http://epp.eurostat.ec.europa.eu/>
- Feng, J., Yan, H., Zhang, B. and Zhang, J.: Prediction of HFC-23 Emission and Analysis of CDM Project Impact in China (in Chinese). Acta Scientiarum Naturalium Universitatis Pekinensis, 48(2), 310-316, 2012.
- Fenhann, J.: UNEP DTU CDM/JI Pipeline Analysis and Database. 2014. URL [www.cdmpipeline.org](http://www.cdmpipeline.org)
- Foroohar, K.: Consumption of HCFC-22 increases steadily. China Chemical Reporter 18 (1), 22, 2007.
- Giroto, S., Minetto, S. and Neksa, P.: Commercial refrigeration system using CO<sub>2</sub> as the refrigerant. International Journal of Refrigeration, 27 (7), 717-723, 2004.
- Goldstein, B., Hiriart, G., Bertani, R., Bromley, C., Gutiérrez-Negrín, L., Huenges, E., Muraoka, H., Ragnarsson, A., Tester, J., and Zui, V. (eds): Geothermal Energy. In: Edenhofer O, Pichs-Madruga R, Sokona Y, Seyboth K, Matschoss P, Kadner S, Zwickel T, Eickemeier P, Hansen G, Schlömer S, C. von Stechow (eds) IPCC special report on renewable energy sources and climate change mitigation. Cambridge University Press, Cambridge and New York, 2011.
- Gschrey, B., Schwarz, W., Elsner, C. and Engelhardt, R.: High increase of global F-gas emissions until 2050, Greenhouse Gas Measurement & Management, 1 (2), 85–92, doi:10.1080/20430779.2011.579352, 2011.
- Halkos, G.: Construction of abatement cost curves: The case of F-gases. Department of Economics, University of Thessaly, Greece, 2010.

- Harnisch, J. and Hendriks, C. 2000. Economic Evaluation of Emission Reductions of HFCs, PFCs and SF<sub>6</sub> in Europe, Special Report. Ecofys, Utrecht.
- Harvey, L.D.D.: Net climatic impact of solid foam insulation produced with halocarbon and non-halocarbon blowing agents, *Building and Environment*, 42 (8), 2860-2879, doi:10.1016/j.buildenv.2006.10.028, 2007.
- Heiskanen, E., Lovio, R. and Jalas, M.: Path creation for sustainable consumption: promoting alternative heating systems in Finland, *Journal of Cleaner Production*, 19 (16), 1892–1900, doi:10.1016/j.jclepro.2011.02.005, 2011.
- Henne, S., Shallcross, D.E., Reimann, S., Xiao, P., Brunner, D., O'Doherty, S. and Buchmann, B.: Future emissions and atmospheric fate of HFC-1234yf from mobile air conditioners in Europe, *Environmental Science & Technology*, 46 (3), 1650–1658, doi: 10.1021/es2034608, 2012.
- Höglund-Isaksson, L., Winiwarter, W. and Purohit, P.: Non-CO<sub>2</sub> greenhouse gas emissions, mitigation potentials and costs in the EU-28 from 2005 to 2030: GAINS methodology. International Institute for Applied Systems Analysis, Laxenburg, Austria, December 2013.
- Hu, J., Li, C. and Yi, X., 2004. Growing Markets of MAC with HFC-134a in China. Proceedings of the Mobile Air Conditioning Summit 2004, 14-15<sup>th</sup> April 2004. Washington, DC, 2004.
- IAI: Results of the 2013 Anode Effect Survey: Report on the Aluminium Industry's Global Perfluorocarbon Gases Emissions Reduction Programme. International Aluminium Institute (IAI), London, 2014.
- IAI: The International Aluminium Institute Report on the Aluminium Industry's Global Perfluorocarbon Gas Emissions Reduction Programme – Results of the 2008 Anode Effect Survey. International Aluminium Institute (IAI), London, 2009.
- IEA/OECD: Energy Technology Perspective (ETP) 2010. International Energy Agency, Paris, 2010.
- IEA/OECD: Energy Technology Perspectives: Scenarios and Strategies to 2050, International Energy Agency (IEA), Paris, 2010.
- IIR: Refrigerated transport: progress achieved and challenges to be met, IIR 16<sup>th</sup> Informatory Note on Refrigeration Technologies, International Institute of Refrigeration (IIR), Paris, 2003.
- IPCC/SRES: Special Report on Emission Scenarios (SRES) – A Special Report of Working Group III of the Intergovernmental Panel on Climate Change (IPCC). Cambridge University Press, Cambridge, UK and New York, USA, 2000.
- IPCC/TEAP: IPCC/TEAP Special Report on Safeguarding the Ozone Layer and the Global Climate System: Issues Related to Hydrofluorocarbons and Perfluorocarbons, Intergovernmental Panel on Climate Change (IPCC) and Technology and Economic Assessment Panel (TEAP), Cambridge University Press, Cambridge and New York, 2005 (See: [http://www.ipcc.ch/pdf/special-reports/sroc/sroc\\_full.pdf](http://www.ipcc.ch/pdf/special-reports/sroc/sroc_full.pdf)).
- IPCC: 2006 IPCC Guidelines for National Greenhouse Gas Inventories. National Greenhouse Gas Inventories Programme. Institute for Global Environmental Strategies, Hayama, Japan, 2006.
- IPCC: Climate Change 1995: The Science of Climate Change. Intergovernmental Panel on Climate Change (IPCC), Cambridge University Press, Cambridge, UK.1996.
- IPCC: Climate Change 2007: Mitigation. Contribution of Working Group III to the Fourth Assessment Report of the Inter-governmental Panel on Climate Change (IPCC). [B. Metz, O.R. Davidson, P.R. Bosch, R. Dave, L.A. Meyer (eds)], Cambridge University Press, Cambridge, United Kingdom and New York, USA, 2007a.

- IPCC: Climate Change 2007: The Physical Science Basis. Contribution of Working Group I to the Fourth Assessment Report of the Intergovernmental Panel on Climate Change [Solomon, S., D. Qin, M. Manning, Z. Chen, M. Marquis, K.B. Averyt, M. Tignor and H.L. Miller (eds.)]. Cambridge University Press, Cambridge, United Kingdom and New York, USA, 2007b.
- IPCC: Climate Change 2014: Mitigation of Climate Change. Contribution of Working Group III to the Fifth Assessment Report of the Intergovernmental Panel on Climate Change (IPCC), Cambridge University Press, Cambridge, UK and New York, USA, 2014.
- IPCC: IPCC Good Practice Guidance and Uncertainty Management in National Greenhouse Gas Inventories (Chapter 3: Industrial Processes), Intergovernmental Panel on Climate Change (IPCC), Cambridge University Press, Cambridge and New York, 2001.
- IPCC: Renewable Energy Sources and Climate Change Mitigation. Special Report of the Intergovernmental Panel on Climate Change (IPCC), Cambridge University Press, Cambridge, UK and New York, USA, 2011.
- IPCC: Revised 1996 IPCC Guidelines for National Greenhouse Gas Inventories, Intergovernmental Panel on Climate Change (IPCC), U.K., 1997.
- Johnson, E.P.: Air-source heat pump carbon footprints: HFC impacts and comparison to other heat sources. *Energy Policy*, 39 (3), 1369-1381, doi:10.1016/j.enpol.2010.12.009, 2011.
- Kanwar, V.: Indian Scenario: Refrigerants in MACs and the importance of Fuel Efficiency. Proceedings of the Mobile Air Conditioning Summit 2004, 14-15<sup>th</sup> April 2004. Washington, DC, 2004.
- Koehler, J., Sonnekalb, M. and Foersterling, S.: 7 Years of on-the-road experience with the refrigerant CO<sub>2</sub>, Technical University Braunschweig, Germany, 2003.
- Koronaki, I.P., Cowan, D., Maidment, G., Beerman, K., Schreurs, M., Kaar, K., Chaer, I., Gontarz, G., Christodoulaki, R.I. and Cazauran, X.: Refrigerant emissions and leakage prevention across Europe – Results from the Real Skills Europe project. *Energy*, 45 (1), 71-80, doi:10.1016/j.energy.2012.05.040, 2012.
- Kvande, H. and Drabløs, A.P.: The Aluminum Smelting Process and Innovative Alternative Technologies. *Journal of Occupational and Environmental Medicine*, 56 (5): S23–32, doi:10.1097/JOM.000000000000062, 2014.
- Lee, D.: Study of Performance Optimization as an Alternative Refrigerant HFC152a in a Mobile Air Conditioning System. *Korean Journal of Air-Conditioning and Refrigeration Engineering*, 27 (6), 321-327, <http://dx.doi.org/10.6110/KJACR.2015.27.6.321>, 2015.
- Levin, I., Naegler, T., Heinz, R., Osusko, D., Cuevas, E., Engel, A., Ilmberger, J., Langenfelds, R. L., Neininger, B., Rohden, C.V., Steele, L.P., Weller, R., Worthy, D.E. and Zimov, S.A.: The global SF<sub>6</sub> source inferred from long-term high precision atmospheric measurements and its comparison with emission inventories, *Atmos. Chem. Phys.*, 10, 2655-2662, doi:10.5194/acp-10-2655-2010, 2010.
- Lund, J.W., Freeston, D.H. and Boyd, T.L.: Direct application of geothermal energy: 2005 worldwide review, *Geothermics*, 34 (6), 691–727, doi:10.1016/j.geothermics.2005.09.003, 2005.
- Lund, J.W., Freeston, D.H. and Boyd, T.L.: Direct utilization of geothermal energy 2010: worldwide review. *Geothermics*, 40 (3), 159–180, doi:10.1016/j.geothermics.2011.07.004, 2011.
- March Consulting Group: UK Emissions of HFCs, PFCs, and SF<sub>6</sub> and Potential Emission Reduction Options: Final Report, Commissioned by the Department of the Environment, Transport and the Regions, United Kingdom, 1999.

- Marks, J. and Rand, S.D.: Implications of non-anode effect-related PFC emissions from primary aluminium, *Greenhouse Gas Measurement & Management*, 2 (4), 171-177, [doi:10.1080/20430779.2012.659731](https://doi.org/10.1080/20430779.2012.659731), 2012.
- McCulloch, A. and Lindley, A.A.: Global emissions of HFC-23 estimated to year 2015. *Atmospheric Environment* 41 (7), 1560 – 1566, [doi:10.1016/j.atmosenv.2006.02.021](https://doi.org/10.1016/j.atmosenv.2006.02.021), 2007.
- McNeil, M. and Letschert, V.: Future air conditioning energy consumption in developing countries and what can be done about it: The potential of efficiency in the residential sector, ECEEE Summer Study, Côte d'Azur, France, 2007.
- Messineo, A.: R744-R717 Cascade Refrigeration System: Performance Evaluation compared with a HFC Two-Stage System. *Energy Procedia*, 14, 56-65, [doi:10.1016/j.egypro.2011.12.896](https://doi.org/10.1016/j.egypro.2011.12.896), 2012.
- MoEF: Roadmap for phase-out of HCFCs in India, Ozone Cell, Ministry of Environment & Forests, Government of India, New Delhi, 2009.
- Mohanraj, M., Jayaraj, S. and Muraleedharan, C.: Environment friendly alternatives to halogenated refrigerants - A review, *International Journal of Greenhouse Gas Control*, 3, 108–119, [doi:10.1016/j.ijggc.2008.07.003](https://doi.org/10.1016/j.ijggc.2008.07.003), 2009.
- Mühle, J., Ganesan, A. L., Miller, B. R., Salameh, P. K., Harth, C. M., Grealley, B. R., Rigby, M., Porter, L. W., Steele, L. P., Trudinger, C. M., Krummel, P. B., O'Doherty, S., Fraser, P. J., Simmonds, P. G., Prinn, R. G., and Weiss, R. F.: Perfluorocarbons in the global atmosphere: tetrafluoromethane, hexafluoroethane, and octafluoropropane, *Atmos. Chem. Phys.*, 10, 5145-5164, [doi:10.5194/acp-10-5145-2010](https://doi.org/10.5194/acp-10-5145-2010), 2010.
- OECD: Statistical Database. Organization for Economic Co-operation and Development (OECD), Paris, 2010  
URL <http://stats.oecd.org/>.
- Ogola, P.F.A., Davidsdottir, B. and Fridleifsson, I.B.: Opportunities for adaptation-mitigation synergies in geothermal energy utilization - Initial conceptual frameworks. *Mitigation and Adaptation Strategies for Global Change*, 17 (5), 507-536, [doi: 10.1007/s11027-011-9339-1](https://doi.org/10.1007/s11027-011-9339-1), 2012.
- Pearson, A.: Refrigeration with ammonia. *International Journal of Refrigeration*, 31 (4), 545–551, [doi:10.1016/j.ijrefrig.2007.11.011](https://doi.org/10.1016/j.ijrefrig.2007.11.011), 2008.
- Purohit, P., Höglund-Isaksson, L., Bertok, I., Chaturvedi, V. and Sharma, M.: Scenario analysis for HFC emissions in India: Mitigation potential and costs. CEEW-IIASA Report, 2016 (Forthcoming).
- Purohit, P., Amann, M., Mathur, R., Bertok, I., Gupta, I., Borcken, J., Cofala, J., Heyes, C., Höglund, L., Klimont, Z., Rafaj, P., Schöpp, W., Toth, G., Wagner, F. and Winiwarter, W.: Scenarios for cost-effective control of air pollution and greenhouse gases in India, International Institute for Applied Systems Analysis (IIASA), Laxenburg, Austria, 2010.
- Rajadhyaksha, D., Wadia, B.J., Acharekar, A.A., and Colbourne, D.: The first 100 000 HC-290 split air conditioners in India. *International Journal of Refrigeration*, 60, 289-296, [doi:10.1016/j.ijrefrig.2015.07.032](https://doi.org/10.1016/j.ijrefrig.2015.07.032), 2015.
- Ravishankara, A.R., Solomon, S., Turnipseed, A.A. and Warren, R.F.: Atmospheric lifetimes of long-lived halogenated species, *Science*, 259 (5092), 194–199, [doi: 10.1126/science.259.5092.194](https://doi.org/10.1126/science.259.5092.194) 1993.
- Repice, C. and Schulz, U.: Reducing HFC Emissions for Bus Air Conditioning: A Change in Technology for Rooftop Applications, *Proceedings of the Mobile Air Conditioning Summit 2004*, 14-15<sup>th</sup> April 2004. Washington, DC, 2004.



- Rhiemeier, J. M. and Harnisch, J.: Sectoral Emission Reduction Potentials and Economic Costs for Climate Change (SERPEC-CC) - F-gases (HFCs, PFCs and SF<sub>6</sub>). Ecofys, Utrecht, October 2009.
- Rigby, M., Mühle, J., Miller, B.R., Prinn, R.G., Krummel, P.B., Steele, L.P., Fraser, P.J., Salameh, P.K., Harth, C.M., Weiss, R.F., Grealley, B.R., O'Doherty, S., Simmonds, P.G., Vollmer, M.K., Reimann, S., Kim, J., Kim, K.-R., Wang, H.J., Olivier, J.G.J., Dlugokencky, E.J., Dutton, G.S., Hall, B.D. and Elkins, J.W.: History of atmospheric SF<sub>6</sub> from 1973 to 2008, *Atmos. Chem. Phys.*, 10, 10305-10320, [doi:10.5194/acp-10-10305-2010](https://doi.org/10.5194/acp-10-10305-2010), 2010.
- RUSAL: Report of the United Company RUSAL Limited, 1141 (pp.), December 2009, URL [rusal.ru/upload/uf/573/PROSPECTUS.pdf](http://rusal.ru/upload/uf/573/PROSPECTUS.pdf) accessed on 17<sup>th</sup> July 2014.
- Rybach, L.: The advance of geothermal heat pumps world-wide, International Energy Agency (IEA), Heat Pump Centre Newsletter, 23, 13–18, 2005.
- Sailor, D.J. and Pavlova A.A.: Air conditioning market saturation and long-term response of residential cooling energy demand to climate change, *Energy*, 28, 941–951, [doi:10.1016/S0360-5442\(03\)00033-1](https://doi.org/10.1016/S0360-5442(03)00033-1), 2003.
- Schimschar, S., Blok, K., Boermans, T. and Hermelink, A.: Germany's path towards nearly zero-energy buildings - enabling the greenhouse gas mitigation potential in the building stock, *Energy Policy*, 39 (6), 3346–3360, [doi:10.1016/j.enpol.2011.03.029](https://doi.org/10.1016/j.enpol.2011.03.029), 2011.
- Schneider, L.R.: Perverse incentives under the CDM: an evaluation of HFC-23 destruction projects. *Climate Policy*, 11 (2), 851-864, doi: 10.3763/cpol.2010.0096, 2011.
- Schwarz, H.G.: Technology diffusion in metal industries: driving forces and barriers in the German aluminium smelting sector, *Journal of Cleaner Production*, 16 (1), S37-S49, [doi:10.1016/j.jclepro.2007.10.024](https://doi.org/10.1016/j.jclepro.2007.10.024), 2008.
- Schwarz, W. and Leisewitz, A.: Emissions and Reduction Potentials of Hydrofluorocarbons, Perfluorocarbons and Sulphur Hexafluoride in Germany. Report for the German Federal Environmental Agency (Umweltbundesamt), Berlin, 1999.
- Schwarz, W., Gschrey, B., Leisewitz, A., Herold, A., Gores, S., Papst, I., Usinger, J., Oppelt, D., Croiset, I., Pedersen, H., Colbourne, D., Kauffeld, M., Kaar, K. and Lindborg, A.: Preparatory study for a review of Regulation (EC) No 842/2006 on certain fluorinated greenhouse gases. Final Report Prepared for the European Commission in the context of Service Contract No 070307/2009/548866/SER/C4, September 2011 URL [http://ec.europa.eu/clima/policies/f-gas/docs/2011\\_study\\_en.pdf](http://ec.europa.eu/clima/policies/f-gas/docs/2011_study_en.pdf).
- Stemmler, S. Folini, D., Ubl, S., Vollmer, M.K., Reimann, S., O'Doherty, S., Grealley, B.R., Simmonds, P.G. and Manning, A.J.: European Emissions of HFC-365mfc, a Chlorine-Free Substitute for the Foam Blowing Agents HCFC-141b and CFC-11. *Environmental Science Technology*, 41 (4), 1145–1151, doi: 10.1021/es061298h, 2007.
- Su, S., Fang, X., Li, L., Wu, J., Zhang, J., Xu, W. and Hu, J.: HFC-134a emissions from mobile air conditioning in China from 1995 to 2030. *Atmospheric Environment*, 102, 122-129, doi:10.1016/j.atmosenv.2014.11.057, 2015.
- Thorsteinsson, H.H. and Tester, J.W.: Barriers and enablers to geothermal district heating system development in the United States, *Energy Policy*, 38, 803–813, [doi:10.1016/j.enpol.2009.10.025](https://doi.org/10.1016/j.enpol.2009.10.025), 2010.
- Tohka, A.: The GAINS Model for Greenhouse Gases -Version 1.0: HFC, PFC and SF<sub>6</sub>, International Institute for Applied Systems Analysis, Laxenburg, Austria, 2005.

Uherek, E., Halenka, T., Borken-Kleefeld, J., Balkanski, Y., Berntsen, T., Borrego, C., Gauss, M., Hoor, P., Juda-Rezler, K., Lelieveld, J., Melas, D., Rypdal, K. and Schmid, S.: Transport impacts on atmosphere and climate: Land transport, *Atmospheric Environment*, 44, 4772–4816, [doi:10.1016/j.atmosenv.2010.01.002](https://doi.org/10.1016/j.atmosenv.2010.01.002), 2010.

UNECE: Statistical Database. United Nations Economic Commission for Europe (UNECE), Geneva, 2010. URL <http://w3.unece.org/pxweb/>.

UNEP: Assessment of HCFCs and environmentally sound alternatives: scoping study on alternatives to HCFC refrigerants under high ambient temperature conditions. Technology and Economic Assessment Panel (TEAP), United Nations Environment Program (UNEP), Nairobi, May 2010.

UNEP: Executive committee of the multilateral fund for the implementation of the Montreal protocol, United Nations Environment Programme (UNEP), 64<sup>th</sup> Meeting, Montreal, 25-29<sup>th</sup> July 2011 (See: <http://www.multilateralfund.org/MeetingsandDocuments/currentmeeting/64/English/1/6429.pdf>).

UNEP: Fact Sheet 2 – Overview of HFC Market Sectors. Fact Sheets on HFCs and Low GWP Alternatives, Ozone Secretariat, United Nations Environment Programme (UNEP), Nairobi, Kenya, 2015c. URL [http://ozone.unep.org/sites/ozone/files/Meeting\\_Documents/HFCs/FS\\_2\\_Overview\\_of\\_HFC\\_Markets\\_Oct\\_2015.pdf](http://ozone.unep.org/sites/ozone/files/Meeting_Documents/HFCs/FS_2_Overview_of_HFC_Markets_Oct_2015.pdf)

UNEP: Fact Sheet 3 - Domestic Refrigeration. Fact Sheets on HFCs and Low GWP Alternatives, Ozone Secretariat, United Nations Environment Programme (UNEP), Nairobi, Kenya, 2015a. URL [http://ozone.unep.org/sites/ozone/files/Meeting\\_Documents/HFCs/FS\\_3\\_Domestic\\_Refrigeration\\_Oct\\_15.pdf](http://ozone.unep.org/sites/ozone/files/Meeting_Documents/HFCs/FS_3_Domestic_Refrigeration_Oct_15.pdf)

UNEP: Fact Sheet 4 – Commercial Refrigeration. Fact Sheets on HFCs and Low GWP Alternatives, Ozone Secretariat, United Nations Environment Programme (UNEP), Nairobi, Kenya, 2015b. URL [http://ozone.unep.org/sites/ozone/files/Meeting\\_Documents/HFCs/FS\\_4\\_Commercial\\_Refrigeration\\_Oct\\_2015.pdf](http://ozone.unep.org/sites/ozone/files/Meeting_Documents/HFCs/FS_4_Commercial_Refrigeration_Oct_2015.pdf)

UNEP: ODS Production in ODP Tonnes. Data Access Centre, Ozone Secretariat, United Nations Environment Programme (UNEP), Nairobi, 2013. URL [http://ozone.unep.org/new\\_site/en/ozone\\_data\\_tools\\_access.php](http://ozone.unep.org/new_site/en/ozone_data_tools_access.php)

UNEP: Report of the Refrigeration, Air conditioning and Heat Pumps Technical Options Committee, 2010, Ozone Secretariat, United Nations Environment Programme (UNEP), Nairobi, 2010.

UNEP: Report of the rigid and flexible foams technical options committee, Ozone Secretariat, United Nations Environment Programme (UNEP), Nairobi, 2006.

UNEP: Report of the task force on HCFC issues and emissions reduction benefits arising from earlier HCFC phase-out and other practical measures, United Nations Environment Programme (UNEP), Nairobi, 2007.

UNFCCC: Common Reporting Format (CRF) Tables and National Inventory Reports (NIRs). United Nations Framework Convention on Climate Change (UNFCCC), Bonn (See: [http://unfccc.int/national\\_reports/](http://unfccc.int/national_reports/) accessed on 9<sup>th</sup> September 2012), 2012.

UN-Habitat: Global Reports on Human Settlements 2005, United Nations Human Settlements Programme (UN-Habitat), Nairobi, Kenya, 2005.

USDOT: Freight Transportation: Global Highlights, 2010. United States Department of Transportation (USDOT), Research and Innovative Technology Administration, Bureau of Transportation Statistics, Washington, D.C., 2010.

- USEPA: Global Emissions Report for Non-CO<sub>2</sub> Gases - Preliminary Report. United States Environmental Protection Agency (USEPA), June 2004.
- USEPA: Transitioning to low-GWP alternatives in commercial refrigeration. EPA-430-F-10-043, United States Environmental Protection Agency (USEPA), Washington, D.C., 2010b. URL [http://www.epa.gov/ozone/downloads/EPA\\_HFC\\_ComRef.pdf](http://www.epa.gov/ozone/downloads/EPA_HFC_ComRef.pdf).
- USEPA: Transitioning to low-GWP alternatives in domestic refrigeration. EPA-430-F-10-042, United States Environmental Protection Agency (USEPA), Washington, D.C., 2010a. URL [http://www.epa.gov/ozone/downloads/EPA\\_HFC\\_DomRef.pdf](http://www.epa.gov/ozone/downloads/EPA_HFC_DomRef.pdf).
- USEPA: Transitioning to low-GWP alternatives in transport refrigeration. United States Environmental Protection Agency (USEPA), Washington, D.C., 2015. URL [https://www.epa.gov/sites/production/files/2015-07/documents/transitioning\\_to\\_low-gwp\\_alternatives\\_in\\_transport\\_refrigeration.pdf](https://www.epa.gov/sites/production/files/2015-07/documents/transitioning_to_low-gwp_alternatives_in_transport_refrigeration.pdf).
- USEPA: Global Mitigation of Non-CO<sub>2</sub> Greenhouse Gases: 2010-2030 (No. EPA-430-R-13-011). United States Environmental Protection Agency (USEPA), Office of Atmospheric Programs (6207J), Washington, D.C., September 2013.
- USGS: Aluminum Statistics and Information. Mineral Resources Program, United States Geological Survey (USGS), Virginia, 2013. URL <http://minerals.usgs.gov/minerals/pubs/commodity/aluminum/>.
- Wang, C.C.: System performance of R-1234yf refrigerant in air-conditioning and heat pump system – An overview of current status, Applied Thermal Engineering, 73 (2), 1412–1420, [doi:10.1016/j.applthermaleng.2014.08.012](https://doi.org/10.1016/j.applthermaleng.2014.08.012), 2014.
- Yan, H.H., Guo, H. and Ou, J.M.: Emissions of halocarbons from mobile vehicle air conditioning system in Hong Kong. Journal of Hazardous Materials, 278, 401–408, [doi: 10.1016/j.jhazmat.2014.06.020](https://doi.org/10.1016/j.jhazmat.2014.06.020), 2014.
- Yang, W., J. Zhou, W. Xu and Zhang, G.: Current status of ground-source heat pumps in China, Energy Policy, 38 (1), 323-332, [doi:10.1016/j.enpol.2009.09.021](https://doi.org/10.1016/j.enpol.2009.09.021), 2010.
- Yoo, S.Y. and Lee, D.W.: Experimental study on performance of automotive air conditioning system using R-152a refrigerant. International Journal of Automotive Technology, 10 (3), 313–320, doi: 10.1007/s12239-009-0036-y, 2009.
